1     **Endosidin20 is a broad-spectrum cellulose synthesis inhibitor with an**  
2                                    **herbicidal function**

3                                    Lei Huang<sup>1,2</sup>, Chunhua Zhang<sup>1,2,\*</sup>

4

5     Running title: Endosidin20 can be an herbicide

6

7     <sup>1</sup> Department of Botany and Plant Pathology, Purdue University, 915 W. State  
8     St., West Lafayette, IN, 47907

9     <sup>2</sup> Purdue Center for Plant Biology, Purdue University, 610 Purdue Mall, West  
10    Lafayette, IN, 47907

11    \* To whom the correspondence should be addressed.

12

13    **One sentence summary:** Cellulose biosynthesis inhibitor Endosidin20 has  
14    synergistic effect with other cellulose synthesis inhibitors and has the potential  
15    to be used as a spray herbicide.

16

17

18

19

20

21

22

23

24

25

26

27

28

29

30

31

32

33 **Abstract:** Cellulose is an important component of plant cell wall that controls  
34 anisotropic cell growth. Disruption of cellulose biosynthesis often leads to  
35 inhibited cell growth. Endosidin20 (ES20) was recently identified as a cellulose  
36 biosynthesis inhibitor (CBI) that targets the catalytic domain of Arabidopsis  
37 cellulose synthase 6 (CESA6) to inhibit plant growth. Here, we characterized  
38 the effects of ES20 on the growth of some other plant species and found that  
39 ES20 is a broad-spectrum plant growth inhibitor. We compared the inhibitory  
40 effects of ES20 and other CBIs on the growth of *cesa6* plants that have  
41 reduced sensitivity to ES20. We found that most of the *cesa6* with reduced  
42 sensitivity to ES20 show normal inhibited growth by other CBIs. ES20 also  
43 shows synergistic inhibitory effect on plant growth when applied together with  
44 other CBIs. We show ES20 has a different mode of action than tested CBIs  
45 isoxaben, indaziflam and C17. ES20 not only inhibits Arabidopsis growth under  
46 tissue culture condition, it inhibits plant growth under soil condition after direct  
47 spraying. We demonstrate that plants carrying two missense mutations can  
48 tolerate dual inhibition by ES20 and isoxaben.

49

50 Key words: Cellulose, Cellulose synthase, Endosidin20, Cellulose biosynthesis  
51 inhibitor, herbicide

52

53

54

55 **Introduction:**

56 Cellulose microfibril is crystalized polymer of  $\beta$ -1,4-D-glucose that serves as  
57 the main load-bearing component in plant cell wall. Cellulose is synthesized by  
58 rosette structured cellulose synthase complex (CSC) at the plasma membrane  
59 (PM) (Mueller et al., 1976; Giddings et al., 1980; Mueller and Brown, 1980;  
60 Pear et al., 1996; Arioli et al., 1998). Each CSC consists of 18 to 36  
61 heterotrimeric cellulose synthases (CESAs) at 1:1:1 molar ratio (Doblin et al.,  
62 2002; Fernandes et al., 2011; Newman et al., 2013; Gonneau et al., 2014; Hill  
63 et al., 2014). The CSCs that synthesize the primary cell wall are composed of  
64 CESA1, CESA3 and CESA6 or CESA6-like subunit (CESA2, 5, or 9) whereas  
65 the CSCs synthesize the secondary cell wall are composed of CESA4, CESA7  
66 and CESA8 (Taylor et al., 2003; Desprez et al., 2007; Persson et al., 2007).  
67 Rosette structured CSCs are located at the PM, Golgi and post-Golgi vesicles  
68 in electron microscope images of freeze-fractured plant cells (Haigler and  
69 Brown, 1986). Live cell imaging using functional fluorescence-tagged CESA  
70 also shows that CSCs are localized at the PM, Golgi, Trans-Golgi Network  
71 (TGN), and vesicles called microtubule-associated CESA compartments  
72 (MASCs) or small CESA compartments (SmaCCs) (Paredes et al., 2006;  
73 Crowell et al., 2009; Gutierrez et al., 2009). CSCs at the PM undergo  
74 bidirectional movement at the PM using microtubules as a guide and powered  
75 by cellulose polymerization (Paredes et al., 2006; Fujita et al., 2013). CSC  
76 subcellular transport requires the vesicle trafficking machinery and other  
77 proteins that interact with CESA. STELLO interacts with multiple CESAs to  
78 control efficient CSC exit of Golgi (Zhang et al., 2016), POM2/CELLULOSE  
79 SYNTHASE INTERACTIVE PROTEIN1(CSI) directly interacts with CESAs at  
80 the central cytoplasmic domain to associate CSCs with microtubules (Gu et al.,  
81 2010; Bringmann et al., 2012; Lei et al., 2012), and COMPANION OF  
82 CELLULOSE SYNTHASE1 (CC1) interacts with CESAs to regulate CSC  
83 transport under salt stress condition (Endler et al., 2015). Successful CSC

84 delivery to the PM also requires the coordinated functions of actin, myosin XI,  
85 exocyst complex and PATROL1 (PTL1) (Sampathkumar et al., 2013; Zhu et al.,  
86 2018; Zhang et al., 2019). Newly identified SHOU4 protein negatively  
87 regulates CSC delivery to the PM and Clathrin-mediated endocytosis removes  
88 CSC from the PM (Bashline et al., 2013; Polko et al., 2018). Thus, cellulose  
89 biosynthesis is a complex process requires coordinated function of multiple  
90 proteins.

91 Cellulose biosynthesis inhibitors (CBIs) are small molecules that inhibit  
92 cellulose biosynthesis by targeting CESAs or other proteins required for  
93 cellulose synthesis. The CBIs often inhibit plant growth, cause cell swollen,  
94 and/or affect CSC subcellular localization (DeBolt et al., 2007; Harris et al.,  
95 2012; Brabham et al., 2014; Xia et al., 2014; Worden et al., 2015; Hu et al.,  
96 2016; Tateno et al., 2016). Isoxaben is one of the well characterized CBIs that  
97 has been widely used in understanding the mechanisms of cellulose  
98 biosynthesis. Isoxaben was originally used as an herbicide to control  
99 broad-leaf weeds a few decades ago because of its high efficiency in inhibiting  
100 plant growth (Huggenberger and Gueguen, 1987; Jamet and Thoisydur, 1988;  
101 Brinkmeyer et al., 1989). It was later found that isoxaben affects plant cell wall  
102 composition (Heim et al., 1990) and single amino acid mutations in *CESA3*  
103 and *CESA6* genes led to resistance to isoxaben in plant growth (Scheible et al.,  
104 2001; Desprez et al., 2002), providing evidence that isoxaben inhibits plant  
105 growth by targeting CESAs. Live cell imaging of plants expressing  
106 fluorescence-tagged CESA treated with isoxaben shows that isoxaben  
107 treatment can rapidly deplete CSC from the PM (Paredes et al., 2006), which  
108 makes it a useful inhibitor in understanding the subcellular trafficking of CSCs.  
109 A recently characterized small molecule C17 also depletes CSCs from the PM  
110 and has inhibitory effects on plant cytokinesis, root growth, and cellulose  
111 biosynthesis (Hu et al., 2016). The mutations in *CESA1*, *CESA3*, and  
112 pentatricopeptide repeat (PPR)-like proteins can overcome the inhibitory effect

113 of C17 on plant growth (Hu et al., 2016). Interestingly, the inhibitor of  
114 mitochondrial complex III can also reduce plants' sensitivity to C17 treatment,  
115 indicating that C17 might have a complex mode of action instead of directly  
116 targets CESA to inhibit plant growth. C17 has inhibitory effect on broad plant  
117 species, indicating it might be a good candidate for herbicide development (Hu  
118 et al., 2019). Indaziflam is a potent CBI that has been commercialized as an  
119 herbicide (Brabham et al., 2014). Interestingly, indaziflam increases the  
120 abundance of CSC at the PM to inhibit cellulose biosynthesis with an unknown  
121 mechanism (Brabham et al., 2014). CESTRIN reduces cellulose content in  
122 plant cell wall and removes CSC from the PM, but its endogenous target  
123 protein has not been characterized (Worden et al., 2015). Morlin is an inhibitor  
124 of microtubule dynamics and in turn affects the trajectories of CSC at the PM  
125 (DeBolt et al., 2007). The collection of CBIs allows transient manipulation of  
126 cellulose biosynthesis process and provides candidate small molecules for  
127 herbicide development.

128 Endosidin20 (ES20) inhibits Arabidopsis cellulose biosynthesis by targeting  
129 the catalytic site of CESA6 (Huang et al., 2020). Multiple missense mutations  
130 in *CESA6* lead to reduced sensitivity to ES20 in plant growth (Huang et al.,  
131 2020). Here, we report the characterization of ES20 on its inhibitory effect on  
132 different plant species and compare the action of ES20 with isoxaben,  
133 indaziflam and C17. We show that ES20 is a broad-spectrum plant growth  
134 inhibitor with a different mode of action than isoxaben, indaziflam and C17.  
135 Most of the mutants that have reduced sensitivity to ES20 are sensitive to  
136 isoxaben, indaziflam and C17. ES20 also has synergistic effect with these  
137 tested CBIs in inhibiting plant growth. We show that ES20 has the potential to  
138 be used as a commercial herbicide and it is possible to create plants with  
139 reduced sensitivity to both ES20 and isoxaben by gene editing.

## 140 **Results:**

### 141 **ES20 is a broad-spectrum plant growth inhibitor**

142 Previous characterization of ES20 activity in Arabidopsis shows that it targets  
143 the catalytic site of CESA6 that is composed of highly conserved amino acids  
144 in CESAs (Huang et al., 2020). High conservation in amino acids at the  
145 catalytic site indicates that ES20 might be a broad-spectrum plant growth  
146 inhibitor that targets CESAs in different plants. We first tested the effects of  
147 ES20 on different dicotyledon and monocotyledon plant species in their growth.  
148 We found that ES20 can significantly inhibit the root growth of dicotyledon  
149 plants dandelion (*Taraxacum officinale*), tobacco (*Nicotiana benthamiana*),  
150 tomato (*Solanum lycopersicum*), and soybean (*Glycine max*) at the  
151 concentration of 5  $\mu$ M (Figure 1A-1H). ES20 also inhibits the growth of  
152 monocotyledon plants rice (*Oryza sativa*) and maize (*Zea mays*) at the  
153 concentration of 20  $\mu$ M (Figure 1I-1L). ES20 inhibition on the growth of two  
154 common grass weeds Perennial Ryegrass (*Lolium perenne*) and Kentucky  
155 Bluegrass (*Poa pratensis*) requires a concentration of 50  $\mu$ M (Figure 1M-1P).  
156 Among the plants we have tested, dandelion, Perennial Ryegrass, Kentucky  
157 Bluegrass, and previously tested Arabidopsis, are common weeds found in  
158 agricultural field and lawn. The inhibitory effects of ES20 on both dicotyledon  
159 and monocotyledon plants indicate that ES20 is a broad-spectrum plant  
160 growth inhibitor.

### 161 **Structure activity relationship analysis of ES20**

162 ES20 (4-Methoxy-N- $\{[2-(2\text{-Methylbenzoyl})\text{Hydrazino}]\text{Carbothioyl}\}$ Benzamide)  
163 is a carbonothioyl benzamide derivative. In order to better understand the  
164 pharmacophore of ES20 that is essential for the inhibition of plant growth, we  
165 tested 11 ES20 analogs on plant growth (Figure 2A). We grew Arabidopsis  
166 Col-0 seedlings on 1  $\mu$ M of different analogs and compared their root length  
167 with those of DMSO control (Figure 2B and 2C). Among the compounds we  
168 tested, only ES20 could significantly inhibit the root growth of Col-0, whereas  
169 none of the 11 analogs affected the root growth. After comparing the structures  
170 of the 11 analogs with that of ES20, we found that the 4-methoxy group and

171 the position of this group is essential for ES20 inhibitory effect. The analogs  
172 that change 4-methoxy group to another group or change its position will not  
173 be active in inhibiting root growth. The methylbenzoyl group is also essential  
174 for ES20 activity. The analogs that alter the methylbenzoyl group by replacing  
175 the benzyl or change the position of the methyl will not be active in inhibiting  
176 plant growth.

177 **ES20 uses a different mode of action than isoxaben, indaziflam and C17**  
178 **to inhibit cellulose biosynthesis**

179 The chemical structures of ES20, isoxaben, indaziflam and C17 are quite  
180 different (Supp. Figure S1), indicating they might use different modes of action  
181 to inhibit cellulose biosynthesis. Since the direct target protein for isoxaben,  
182 indaziflam, and C17 are not characterized, we compared their activities with  
183 that of ES20. We first tested whether our mutants that have reduced sensitivity  
184 to ES20 also have altered sensitivity to isoxaben, indaziflam and C17. We  
185 found that ES20, isoxaben, indaziflam and C17 can inhibit Arabidopsis growth  
186 at different efficiencies. Indaziflam is the most efficient in inhibiting plant growth.  
187 The root length of 5 days old Arabidopsis plants grown in the presence of 0.25  
188 nM of indaziflam is only about 30% of those grown in the DMSO control media  
189 (Figure 3, SYP61-CFP and PIN2-GFP control plants). Isoxaben and C17 can  
190 inhibit Arabidopsis root growth for more than 50% at the concentration of 8 nM  
191 and 200 nM, respectively (Figure 3, SYP61-CFP and PIN2-GFP control plants).  
192 As reported previously, ES20 can inhibit about 80% of Arabidopsis root growth  
193 at the concentration of 1  $\mu$ M (Figure 3, SYP61-CFP and PIN2-GFP control  
194 plants). When we grow *es20r* plants in growth media supplemented with 1  $\mu$ M  
195 ES20, all of them show reduced sensitivity to ES20 when compared with the  
196 SYP61-CFP and PIN2-GFP control plants (Figure 3). When we grow these  
197 *es20r* mutants in the growth media supplemented with 8 nM isoxaben, 0.25 nM  
198 indaziflam, or 200 nM C17, most of the *es20r* plants display inhibited growth by  
199 these CBIs at a level similar to the control plants (Figure 3). However, we did

200 notice some of the *esr20rs* show reduced sensitivity to isoxaben, indaziflam  
201 and C17 (Figure 3). After quantification of the relative root growth inhibition, we  
202 find *esr20r1*, *esr20r3*, *esr20r4*, *esr20r5* and *esr20r10* have reduced sensitivity  
203 to isoxaben, *esr20r1*, *esr20r3*, *esr20r4*, *esr20r5* show reduced sensitivity to  
204 indaziflam, and *esr20r3*, *esr20r4*, *esr20r5*, *esr20r6*, *esr20r7* and *esr20r12*  
205 show reduced sensitivity to C17 (Figure 3). The mutants' different sensitivity to  
206 these CBIs imply that ES20 has a different target site than other three CBIs.

207 In our previous study, we found that six predicted mutations at CESA6 catalytic  
208 site (D562N, D564N, D785N, Q823E, R826A, W827A) from modeled structure  
209 cause plants to have reduced sensitivity to ES20 in growth (Huang et al., 2020).  
210 To further test whether ES20 and other CBIs have the same binding site, we  
211 examined how the six predicted mutations at the catalytic site and two  
212 predicted mutations beyond the catalytic site (L365F and D395N) in CESA6  
213 affect plants' response to the three CBIs. Consistent with previous result, six  
214 predicted mutations at the catalytic site cause reduced sensitivity to ES20 and  
215 two predicted mutations beyond the catalytic do not affect plants' sensitivity to  
216 ES20 (Figure 4), whereas none of the predicted mutations affects plants'  
217 sensitivity to other three CBIs (Figure 4). Plants' reduced sensitivity to ES20  
218 caused by predicted mutations but normal sensitivity to other three CBIs  
219 further implies that ES20 has a different target site than other three CBIs.

220 Three mutations, CESA3<sup>G998D</sup> (*ixr1-1*), CESA3<sup>T942I</sup> (*ixr1-2*) and CESA6<sup>R1064W</sup>  
221 (*ixr2-1*) have been found to cause reduced sensitivity to isoxaben (Scheible et  
222 al., 2001; Desprez et al., 2002). Isoxaben is thus believed to target CESA  
223 directly to inhibit cellulose biosynthesis and has been widely used in cellulose  
224 biosynthesis research (Scheible et al., 2001; Desprez et al., 2002; Shim et al.,  
225 2018). The originally identified mutations lead to reduced sensitivity to  
226 isoxaben are located at the C-terminal region of CESAs while most of the  
227 mutations that cause reduced sensitivity to ES20 are located at the central  
228 cytoplasmic domain. We tested how the isoxaben insensitive mutants respond



229 to ES20. We grew *ixr1-1*, *ixr1-2* and *ixr2-1* on growth medium supplemented  
230 with DMSO (0.1%), isoxaben (10 nM) or ES20 (1  $\mu$ M) for five days. We found  
231 the three *ixr* mutants display reduced sensitivity to isoxaben but these mutant  
232 plants have the same sensitivity to ES20 as wild type plants (Figure 5). The  
233 normal response of isoxaben resistant plants to ES20 also indicates ES20  
234 targets CESA differently than isoxaben.

### 235 **ES20 has synergistic inhibition effect on plant growth with other CBIs**

236 Since ES20 has a different mode of action compared with isoxaben, indaziflam  
237 and C17, we wonder whether ES20 also has synergistic effects with these  
238 CBIs in inhibiting plant growth. We first did a series of concentration test for  
239 ES20, isoxaben, indaziflam and C17 to determine the maximum concentration  
240 for each that will not inhibit the root growth of Col-0 seedlings. As shown in  
241 Figure 6 and Figure S2, 250 nM ES20, 4 nM isoxaben, 0.06 nM indaziflam or  
242 40 nM C17 alone does not significantly inhibit wildtype plant root growth.  
243 However, when we did the dual drug treatments, we found that 250 nM ES20  
244 mixed with 4 nM isoxaben, 0.06 nM indaziflam or 40 nM C17 could significantly  
245 inhibit the root growth compared with DMSO control treatment or the single  
246 drug treatment (Figure 6, Figure S2). Synergistic effects of ES20 with other  
247 CBIs in inhibiting root growth further indicates that ES20 has a different mode  
248 of action than isoxaben, indaziflam and C17.

### 249 **Editing on *CESA6* allows plants to tolerate ES20 inhibition without** 250 **affecting growth**

251 Previous chemical genetic screens allow us to obtain 15 *CESA6* mutants that  
252 have reduced sensitivity to ES20 in growth. Among these mutants, *es20r1*  
253 (*CESA6*<sup>E929K</sup>) does not have significantly reduced root growth by itself and  
254 displays least level of growth inhibition by ES20 (Figure 2) (Huang et al., 2020).  
255 Normal growth and strong tolerance to ES20 make it a promising approach to  
256 edit *CESA6* to create ES20-tolerant plants. We introduced a single nucleotide  
257 mutation in YFP-*CESA6* genomic construct to create YFP-*CESA6*<sup>E929K</sup>

258 construct. We then transformed YFP-CESA6 and YFP-CESA6<sup>E929K</sup> constructs  
259 to *cesa6* null mutant *prc1-1*. We then screened for single insertion lines for  
260 both YFP-CESA6 and YFP-CESA6<sup>E929K</sup> and obtained independent  
261 homozygous single insertion transgenic lines for YFP-CESA6 and  
262 YFP-CESA6<sup>E929K</sup>. We found that expression of YFP-CESA6 can rescue the  
263 growth defect of *prc1-1* and the transgenic plants have normal sensitivity to  
264 ES20 inhibition when the plants are grown on growth medium supplemented  
265 with ES20 (Figure 7A and 7B). However, YFP-CESA6<sup>E929K</sup> can not only rescue  
266 the growth defect of *prc1-1*, the transgenic plants display tolerance to ES20  
267 inhibition in root growth when grown on growth media supplemented with  
268 ES20 (Figure 7A and 7B). We also grew the transgenic plants on normal  
269 growth media and then treated the seedlings with ES20 overnight. We found  
270 that YFP-CESA6;*prc1-1* plants are swollen and have increased root diameter  
271 at root tips after ES20 treatment (Figure 7C and 7D). However,  
272 YFP-CESA6<sup>E929K</sup>;*prc1-1* plants are not swollen under the same ES20  
273 treatment condition (Figure 7C and 7D). The growth assays indicate that  
274 CESA6<sup>E929K</sup> mutation is sufficient in causing plants to tolerate ES20 inhibition  
275 in growth.

276 ES20 targets CESA6 and short-term ES20 treatment causes reduced CSC  
277 localization at the PM (Huang et al., 2020). Since YFP-CESA6<sup>E929K</sup> is sufficient  
278 in causing plants to be tolerant to the growth inhibition and cell swollen caused  
279 by ES20, we wonder whether the tolerance occurs at the cellular level as well.  
280 We performed short-term ES20 treatment on YFP-CESA6;*prc1-1* and  
281 YFP-CESA6<sup>E929K</sup>;*prc1-1* plants and examined CSC localization. Consistent  
282 with previous report, YFP-CESA6;*prc1-1* seedlings treated with 6  $\mu$ M ES20 for  
283 30 min have significantly reduced CSC density at the PM compared with the  
284 DMSO control treatment (Figure 7E and 7F). However, 30 min of 6  $\mu$ M ES20  
285 treatment does not significantly affect the CSC density at the PM in  
286 CESA6<sup>E929K</sup>;*prc1-1* seedlings (Figure 7E and 7F). Thus, a single amino acid

287 change in CESA6 is sufficient to cause plants to tolerate ES20 in plant growth  
288 and in CSC trafficking at the cellular level.

289 Our previously identified *cesa6* alleles with reduced sensitivity to ES20 provide  
290 guidance for generating other plant species with reduced sensitivity to ES20  
291 through genetic engineering method. In order to test whether the reduced  
292 ES20 sensitivity trait is dominant or recessive, we transformed three  
293 YFP-CESA6 genomic constructs with native *CESA6* promoter carrying  
294 missense mutations (YFP-CESA6<sup>E929K</sup>, YFP-CESA6<sup>T783I</sup> and YFP-CESA6<sup>D396N</sup>)  
295 to Arabidopsis wildtype Col-0 through agrobacterium-mediated transformation.  
296 We grew transgenic plants expressing YFP-CESA6<sup>E929K</sup>, YFP-CESA6<sup>T783I</sup> and  
297 YFP-CESA6<sup>D396N</sup> on growth medium supplemented with DMSO (0.1%) or  
298 ES20 (1  $\mu$ M). These transgenic plants do not have obvious growth defects  
299 compared with Col-0 when grown on DMSO control medium (Figure 8).  
300 However, the transgenic plants expressing YFP-CESA6<sup>E929K</sup>, YFP-CESA6<sup>T783I</sup>  
301 and YFP-CESA6<sup>D396N</sup> have longer roots than YFP-CESA6 plants when grown  
302 on growth media supplemented with ES20 (Figure 8). We also noticed that  
303 plants expressing mutated CESA6 constructs in Col-0 background have lower  
304 level of ES20 tolerance than those of the EMS mutants (Figure 3, Figure 8),  
305 indicating reduced sensitivity to ES20 caused by CESA6 mutations are  
306 semi-dominant.

### 307 **Generation of ES20 and isoxaben dual tolerant plant**

308 Long time repetitive application of single herbicide could be problematic since  
309 herbicide tolerant weeds emerge by natural mutation due to the single  
310 selective pressure (Heap, 2014). Since ES20 and isoxaben seem to target  
311 CESA at different binding site, application of ES20 and isoxaben together is  
312 expected to reduce the chance of herbicide tolerant weed development.  
313 Establishing a strategy to create crop plants that are resistant to both ES20  
314 and isoxaben is expected to be important for using ES20 and isoxaben for  
315 weed control in agricultural production. We tried to combine ES20 and

316 isoxaben tolerant trait in plants by crossing the isoxaben insensitive mutant  
317 *ixr1-1* with *es20r1*. We obtained the homozygous *ixr1-1;es20r1* lines in F3  
318 generation and tested the growth phenotype on growth medium supplemented  
319 with DMSO (0.1%), ES20 (1  $\mu$ M), isoxaben (12 nM) and ES20 (1  $\mu$ M) plus  
320 isoxaben (12 nM). As shown in Figure 9A and Figure 9B, *ixr1-1* and *es20r1*  
321 seedlings do not have obvious root growth defects compared with wild type  
322 plants when grown on growth media supplemented with DMSO. However,  
323 *ixr1-1;es20r1* double mutant plants have slightly reduced root length compared  
324 with wild type (Figure 9A and 9B). The single mutant plants of *ixr1-1* and  
325 *es20r1* have reduced sensitivity to isoxaben and ES20, respectively (Figure 9A  
326 and 9B). However, the *ixr1-1;es20r1* double mutants can tolerate the mixture  
327 of ES20 (1  $\mu$ M) and isoxaben (12 nM) treatment (Figure 9A and 9B). As  
328 *ixr1-1;es20r1* double mutant plants have slightly reduced root growth at  
329 seedling age, we wanted to see whether there will be growth phenotype in later  
330 growth stage. We grew the mutant plants in the soil till the end of their life cycle  
331 and found that *ixr1-1* single mutant and *ixr1-1;es20r1* double mutant plants  
332 have smaller rosette when compared with wild type (Figure 9C and 9D). The  
333 height of 40 days old soil grown *ixr1-1;es20r1* double mutant plant is also  
334 shorter compared with wild type and the single mutants (Figure 9E and 9F).  
335 Thus, although the double mutant of *ixr1-1;es20r1* can tolerate both ES20 and  
336 isoxaben, there is some trade off in growth.

### 337 **ES20 has the potential to be used as a spray herbicide**

338 To test whether ES20 could be used as a potential herbicide, we sprayed soil  
339 grown wildtype plant with ES20 to see whether it could inhibit the growth or  
340 even kill the soil grown plants after spraying. We transferred 5 days old Col-0  
341 seedlings grown in growth medium to the soil and sprayed with 50 mL sterile  
342 water contained DMSO (0.5%) or ES20 (500  $\mu$ M), respectively. 7 days after  
343 spraying, ES20 treated seedlings almost completely died while the DMSO  
344 treated seedlings showed normal growth (Figure 10). The small-scale spraying

345 experiments indicate ES20 has the potential to be used as a spray herbicide.

346 **Discussion:**

347 Weeds compete with crops for limited resources of nutrition, space, light, and  
348 water and are thus undesirable plant species in agricultural production. In  
349 extreme cases when the weeds are left without any control, they may cause  
350 over 80% crop yield loss (Heap, 2014). Herbicides have been enthusiastically  
351 adopted by worldwide growers and have greatly accelerated the agricultural  
352 production efficiency and world crop production ever since they were  
353 developed. Based on mode of actions, herbicides could be further divided into  
354 different groups such as photosynthesis inhibitor, acetolactate synthase  
355 inhibitor, cellulose synthesis inhibitor (CBI), etc (Gianessi, 2013). Due to the  
356 natural mutation, herbicide tolerant weeds have become problematic after long  
357 time repetitive usage of specific leading herbicide (Delye et al., 2013; Heap,  
358 2014). According to the international survey of herbicide resistant weeds  
359 (<http://www.weedscience.org>), 262 weed species (152 dicots and 110  
360 monocots) have been reported to evolve herbicide resistance to 23 of the 26  
361 known herbicide sites of action and to 167 different herbicides. Herbicide  
362 resistant weeds have been reported in 93 crops in 70 countries until 2019.  
363 Take 2,4-D for example, this well-known synthetic auxin has been  
364 commercialized ever since 1940s, and is one of the oldest and most widely  
365 used herbicides to control broadleaf weeds and woody plants in numerous  
366 small grain, fruit, and vegetable crops (Peterson et al., 2016). After over 70  
367 years' application, more than 40 weed species have already been reported to  
368 show resistance to 2,4-D according to the international survey of herbicide  
369 resistant weeds (<http://www.weedscience.org>). So finding novel herbicide is  
370 quite urgent to guarantee the crop production in order to feed the world ever  
371 increasing population.

372 CBIs are useful tool not only to understand cellulose biosynthesis, but also  
373 provide valuable resources for the commercial herbicide development. CBIs

374 are the few herbicides which show less occurrence of weed tolerance (Heap,  
375 2014). Most of the CBIs are discovered from chemical library screen and more  
376 than 10 CBIs have been identified so far (Tateno et al., 2016). Interestingly, the  
377 mutations at different CESAs, especially the primary cell wall related CESA 1,  
378 3 and 6, have been found to cause reduced sensitivity to CBIs (Scheible et al.,  
379 2001; Desprez et al., 2002; Tateno et al., 2016; Hu et al., 2018). The CBIs and  
380 the reduced sensitivity mutants are valuable resources for the development of  
381 novel herbicides and for the breeding of herbicide tolerant crops which can be  
382 accomplished by gene editing technology (Hu et al., 2019).

383 Based on the effect of CBIs on CSC trafficking and the identified CESA  
384 mutants, it is reasonable to assume some CBIs may target the CESA directly.  
385 ES20 is a newly identified CBI that shares some characteristics with other  
386 known CBIs in terms of cellulose content reduction and ectopic accumulation  
387 of lignin and callose after treatment. The genetic and biochemistry evidences  
388 strongly support that ES20 targets CESA6 at the catalytic site (Huang et al.,  
389 2020). However, ES20 has a different mode of action than other three CBIs  
390 that we have tested based on a couple of observations. Firstly, most of the  
391 ES20 insensitive mutants are sensitive to other three CBIs whereas all three  
392 isoxaben insensitive mutants are sensitive to ES20. Secondly, all of the  
393 predicted ES20 binding site mutants are sensitive to the other three CBIs  
394 which indicate the binding pocket of ES20 is different than the other three  
395 tested CBIs.

396 Several ES20 insensitive mutants show cross tolerance to isoxaben,  
397 indaziflam and C17. For example, *es20r3* (CESA6<sup>L935E</sup>), *es20r4* (CESA6<sup>D605N</sup>)  
398 and *es20r5* (CESA6<sup>S360N</sup>) have reduced sensitivity to all four CBIs we have  
399 tested (Figure 3). The amino acids L935, D605 and S360 are important for  
400 CESA6 function because the mutants of *es20r3* (CESA6<sup>L935E</sup>), *es20r4*  
401 (CESA6<sup>D605N</sup>) and *es20r5* (CESA6<sup>S360N</sup>) have obvious root growth defects  
402 (Figure 3). The reduced sensitivities to CBIs caused by mutations in the same

403 amino acids indicates these CBIs may share some common features in  
404 affecting cellulose synthesis although their exact target sites are different. It is  
405 possible that these amino acids are close to the target sites for these CBIs.  
406 This will remain as an open question because direct interaction between CESA  
407 and isoxaben, indaziflam and C17 needs further characterization. It is  
408 especially interesting for indaziflam because this CBI seems act differently  
409 than others at the cellular level. Indaziflam treatment causes increased CSC  
410 density at the PM, which is opposite to the effects of ES20, isoxaben, and C17  
411 (Paredes et al., 2006; Brabham et al., 2014; Hu et al., 2016; Huang et al.,  
412 2020). It will be very interesting to investigate why the same mutations can  
413 lead to resistance to CBIs with different effects on CSC subcellular localization.  
414 ES20 has synergistic inhibition effect on plant growth with other CBIs (Figure  
415 6), which implies that it could be used together with other CBIs as herbicides to  
416 increase the weed control efficiency and to reduce the development of weed  
417 tolerance. ES20 could inhibit plant growth in soil condition, although a relative  
418 high dosage is needed (Figure 10). A future structure optimization will allow  
419 ES20 to be developed into a commercial herbicide with higher efficiency.  
420 Among 15 mutants that have reduced sensitivity to ES20, CESA6<sup>E929K</sup> is the  
421 most efficient in tolerating the inhibitory effect of ES20. At the cellular level,  
422 PM-localized CESA6<sup>E929K</sup> is not affected by ES20 treatment. ES20 tolerance  
423 caused by single amino acid change in CESA6 indicates that it is possible to  
424 create other ES20-tolerant crop species using gene editing technology.  
425 CRISPR-mediated gene editing has been suggested to obtain C17-tolerant  
426 plants (Hu et al., 2019) and it is possible to create ES20 tolerant plants as well  
427 with CRISPR technology. We also show that it is possible to create plants that  
428 have dual tolerance to ES20 and isoxaben. The double mutant of *ixr1-1;es20r1*  
429 show reduced sensitivity to the co-treatment of ES20 and isoxaben (Figure 9),  
430 indicating it is possible to create crops that are resistant to both ES20 and  
431 isoxaben. We did notice some slightly reduced root growth, smaller rosettes

432 and shorter height in the double mutant of *ixr1-1;es20r1*, indicating  
433 spontaneous mutation at CESA3 and CESA6 further affects the normal  
434 function of CSC complex. The previous Quinoxiphen and isoxaben dual  
435 tolerant *CESA1* and *CESA3* double mutant *cesa1<sup>aegeus</sup>/cesa3<sup>ixr1-2</sup>* also showed  
436 a far more pronounced dwarf phenotype than either of the single mutants  
437 (Harris et al., 2012). However, recently reported *CESA3<sup>S983F</sup>* and *CESA6<sup>ixr2-1</sup>*  
438 double mutant shows isoxaben and C17 dual tolerance but does not seem to  
439 have obvious growth phenotypes (Hu et al., 2019), which indicates different  
440 combination of mutated *CESAs* may affect the plant growth differently and it is  
441 still possible to obtain *CESA* dual drug tolerant plant without growth penalty. It  
442 is worth trying to create double amino acids mutations in *CESA6* for  
443 *irx2-1;es20r1* and test for the plants' response to both ES20 and isoxaben and  
444 examine their growth phenotypes. Taken together, we have shown that ES20  
445 has different mode of action than isoxaben, indaziflam and C17. ES20 has  
446 synergistic effect with isoxaben, indiaziflam and C17 in inhibiting plant growth.  
447 ES20 could be used as a potential spray herbicide and it is possible to create  
448 plants that can tolerate both ES20 and isoxaben by gene editing technologies.

## 449 **Materials and methods**

### 450 *Plant material and growth conditions*

451 To test the effect of ES20 on different plant species, Arabidopsis Col-0, tomato  
452 Micro-tom, soybean Williams 82, maize B73, and rice Nipponbare, perennial  
453 ryegrass Bright star and Kentucky bluegrass Brilliant were used. Dandelion  
454 seeds were collected from wild in West Lafayette, Indiana, USA. The seeds of  
455 Arabidopsis, dandelion, tomato, soybean, maize and rice were sterilized and  
456 sowed on half strength Murashige and Skoog medium ( $\frac{1}{2}$  MS) with 0.8% agar  
457 at pH 5.8 with different concentrations of ES20. The plants were grown  
458 vertically under continuous light of  $130 \mu\text{mol m}^{-2} \text{s}^{-1}$  intensity at 22 °C.  
459 Kentucky Bluegrass and Perennial Ryegrass seeds were directly grown in filter  
460 paper soaked in sterile water supplemented with DMSO (0.1%) or ES20 (50



461  $\mu\text{M}$ ) at 22 °C.

#### 462 *Different CBI treatments*

463 To test the sensitivity of *es20rs* and CESA binding site mutants to different  
464 CBIs, sterilized seeds were grown on ½ MS medium supplemented with  
465 indicated concentrations of CBIs. Equal volume of DMSO was used as a  
466 control. After 5 days of growth, the plates were scanned using Epson  
467 Perfection V550 scanner. The root length of plants was measured using  
468 ImageJ.

#### 469 *Live cell imaging with spinning-disk confocal microscopy (SDCM)*

470 SDCM was used to examine the localization of CSC at the PM. The seedlings  
471 of YFP-CESA6;*prc1-1* and YFP-CESA6<sup>E929K</sup>;*prc1-1* were grown on ½ MS  
472 medium for 5 days in vertical orientation. The seedlings were treated with  
473 DMSO or 6  $\mu\text{M}$  ES20 for 30 min. Two thin strips of double-sided tape were  
474 placed on top of the glass slides about 2 cm apart from each other. 100  $\mu\text{l}$  of ½  
475 MS liquid growth media containing DMSO (0.1%) or 6  $\mu\text{M}$  ES20 was applied to  
476 the glass slides with double-sided tape and then the seedlings were mounted  
477 in the liquid media carefully with tweezers. A 22 x 40 mm cover glass was  
478 placed on top of the double-sided tape for imaging. The images were taken  
479 from the 2nd or 3rd epidermal cells below the first obvious root hair initiation in  
480 the root elongation region. The SDCM that we used for imaging CSCs is a  
481 Yokogawa scanner unit CSU-X1-A1 mounted on an Olympus IX-83  
482 microscope, equipped with a 100X 1.45–numerical aperture (NA) UPlanSApo  
483 oil objective (Olympus) and an Andor iXon Ultra 897BV EMCCD camera  
484 (Andor Technology). YFP fluorescence was excited with 515-nm laser line and  
485 emission collected through 542/27-nm filter.

#### 486 *PM-localized CSC density analysis*

487 To examine the effect of ES20 on PM-localized CSC density, images from  
488 SDCM were analyzed using ImageJ. The Freehand selection tool was used to

489 choose region of interest (ROI) to avoid CSCs from Golgi. CSC particles from  
490 selected ROIs were detected on 8-bit images using the Find Maxima tool with  
491 the same noise threshold for all images. CSC particle density in ROIs was  
492 calculated by dividing the numbers of particles by the ROI area.

#### 493 *ES20 spray test on soil grown plants*

494 Arabidopsis Col-0 seedlings grown on ½ MS growth medium for 5 days were  
495 transferred to soil and covered with transparent plastic lid for 2 days. The  
496 plants were then sprayed with 50 mL sterile water supplemented with DMSO  
497 (0.5%) or ES20 (500 µM). The plants were imaged 7 days after spaying.

#### 498 *Structure activity relationship analysis of ES20*

499 To test the structure activity relationship of ES20, 11 ES20 analogs were  
500 ordered from Vitascreen (Champaign, IL, USA). Sterilized Arabidopsis Col-0  
501 seeds were grown on ½ MS medium supplemented with 1 µM ES20 or  
502 different analogs. Equal volume of DMSO was used as a control. After 5 days  
503 of growth, the plates were scanned using Epson Perfection V550 scanner. The  
504 root length of plants was measured using ImageJ.

#### 505 *Generation of transgenic Arabidopsis plants*

506 YFP-*CESA6*<sup>E929K</sup> construct was created as described previously (Huang et al.,  
507 2020). In brief, the genomic construct of *CESA6* containing endogenous  
508 *CESA6* promoter was cloned into modified binary vector pH7WGR2 with 35S  
509 promoter and RFP-tag removed. YFP-tag was inserted into the N-terminal  
510 region of the *CESA6* start codon. The mutation E929K was introduced by  
511 site-directed mutagenesis. The verified plasmids were transformed into Col-0  
512 or *CESA6* null mutant *prc1-1* (CS297) using *Agrobacterium tumefaciens*  
513 mediated floral dipping (Clough and Bent, 1998). The *prc1-1* seeds were  
514 obtained from the Arabidopsis Biological Resource Center (ABRC).

#### 515 **Acknowledgments**

516 We thank Dr. Yiwei Jiang for sharing the seeds of Kentucky Bluegrass and

517 Perennial Ryegrass. We thank Dr. Cankui Zhang for sharing the rice seeds.  
518 We thank Dr. Christopher J. Staiger for allowing us to use the Spinning Disc  
519 Confocal Microscope for imaging CSC localization. The research is supported  
520 by Trask Trust Fund to C.Z and Purdue University provost's startup fund to C.  
521 Z.

522

### 523 **Figure legends**

524 **Figure 1.** ES20 is a broad-spectrum plant growth inhibitor. A. representative  
525 seedlings of 5 days old dandelion (A), tobacco (C), tomato (E), soybean (G),  
526 rice (I), maize (K), perennial ryegrass (M) and Kentucky bluegrass (O) treated  
527 with DMSO (0.1%) and indicated concentration of ES20. Perennial ryegrass  
528 and Kentucky bluegrass seeds were soaked in sterile water supplemented  
529 with DMSO (0.1%) or ES20 (50  $\mu$ M), whereas other plants' seeds were grown  
530 on solid  $\frac{1}{2}$  MS growth medium supplemented with DMSO (0.1%) or indicated  
531 concentration of ES20. Scale bars: 1 cm. B, D, F, H, J, L, N and P,  
532 quantification of root length of A, C, E, G, I, K, M and O, respectively. \*  
533 indicates  $p < 0.05$  and \*\*\* indicates  $p < 0.001$ , by two-tailed student's *t* test in  
534 comparison with DMSO treatment. Data represent mean  $\pm$  SD.  $n = 10, 15, 10,$   
535  $8, 12, 10, 10, 9$  for panels B, D, F, H, J, L, N and P, respectively.

536

537 **Figure 2.** Structure activity relationship analysis of ES20. A. Chemical  
538 structures of ES20 and 11 analogs. B. 5 days old representative Arabidopsis  
539 Col-0 seedlings grew on  $\frac{1}{2}$  MS growth medium supplemented with DMSO  
540 (0.1%) or 1  $\mu$ M different analogs. Scale bar: 1 cm. C. Quantification of root  
541 length of seedlings shown in B. Data represent mean  $\pm$  SD.  $n = 10$ . The letters  
542 indicate statistically significant differences determined by one-way ANOVA  
543 tests followed by Tukey's multiple comparison tests in different samples.  
544 Different letters indicate significant differences between groups ( $p < 0.05$ ).

545

546 **Figure 3.** The growth of *es20rs* in the presence of isoxaben, indaziflam and

547 C17. A. Representative seedlings of 5 days old *es20rs* grown on  $\frac{1}{2}$  MS  
548 medium supplemented with DMSO (0.1%), ES20 (1  $\mu$ M), isoxaben (8 nM),  
549 indaziflam (0.25 nM) or C17 (200 nM). Scale bars: 1 cm. B. Quantification of  
550 the relative root length of seedlings as shown in A. The letters indicate  
551 statistically significant differences determined by one-way ANOVA tests  
552 followed by Tukey's multiple comparison tests in different samples. Different  
553 letters indicate significant differences between groups ( $p < 0.05$ ). Data  
554 represent mean  $\pm$  SD.  $n = 12$ . ISO: isoxaben. IND: indaziflam.

555

556 **Figure 4.** Plants expressing CESA6 carrying predicted mutations at the  
557 modeled binding site are sensitive to isoxaben, indaziflam and C17. A. 5 days  
558 old representative seedlings of *prc1-1/cesa6* complemented with wild type  
559 CESA6 or mutated CESA6 carrying predicted mutations at modeled catalytic  
560 site grown on  $\frac{1}{2}$  MS medium supplemented with DMSO (0.1%), ES20 (1  $\mu$ M),  
561 isoxaben (8 nM), indaziflam (0.25 nM) or C17 (200 nM). Scale bars: 1 cm. B.  
562 Quantification of the relative root length of seedlings as mentioned in A. The  
563 letters indicate statistically significant differences determined by one-way  
564 ANOVA tests followed by Tukey's multiple comparison tests in different  
565 samples. Different letters indicate significant differences between groups ( $p <$   
566 0.05). Data represent mean  $\pm$  SD.  $n = 12$ . ISO: isoxaben. IND: indaziflam.

567

568 **Figure 5.** Isoxaben insensitive mutants are sensitive to ES20. A.  
569 Representative seedlings of 5 days old Col-0 and three isoxaben insensitive  
570 mutants (*ixr1-1*, *ixr1-2* and *ixr2-1*) grown on  $\frac{1}{2}$  MS growth medium  
571 supplemented with DMSO (0.1%), isoxaben (10 nM) or ES20 (1  $\mu$ M). Scale  
572 bar: 1 cm. B. Quantification of root length of seedlings as shown in A. \*\*  
573 indicates  $p < 0.01$ , \*\*\* indicates  $p < 0.001$ , by two-tailed student's t test in  
574 comparison with Col-0. Data represent mean  $\pm$  SD.  $n = 9$ . ISO: isoxaben.

575

576 **Figure 6.** ES20 has synergistic inhibition effect on root growth with isoxaben,

577 indaziflam and C17. A. Representative seedlings of 5 days old Col-0 grown on  
578  $\frac{1}{2}$  MS medium supplemented with DMSO (0.1%), ES20 (0.25  $\mu$ M), isoxaben (4  
579 nM), indaziflam (0.06 nM), C17 (0.04  $\mu$ M) and a mixture of ES20 (0.25  $\mu$ M)  
580 with three other inhibitors. Scale bar: 1 cm. B. Quantification on the root length  
581 of seedlings as shown in A. The letters indicate statistically significant  
582 differences determined by one-way ANOVA tests followed by Tukey's multiple  
583 comparison tests in different samples. Different letters indicate significant  
584 differences between groups ( $p < 0.05$ ). Data represent mean  $\pm$  SD.  $n = 15$ . ISO:  
585 isoxaben. IND: indaziflam.

586

587 **Figure 7.** CESA6 point mutation E929K abolishes ES20's inhibitory effect on  
588 root growth and on the depletion of CSC localization at the PM. A.  
589 Representative seedlings of 5 days old *prc1-1*, Col-0 and *prc1-1*  
590 complemented with wild type or mutated CESA6 constructs grown on the  $\frac{1}{2}$   
591 MS medium supplemented with DMSO (0.1%) or ES20 (1  $\mu$ M). Scale bars: 1  
592 cm. B. Quantification on the root length of seedlings as shown in A. The letters  
593 indicate statistically significant differences determined by one-way ANOVA  
594 tests followed by Tukey's multiple comparison tests in different samples.  
595 Different letters indicate significant differences between groups ( $p < 0.05$ ).  
596 Lower- and upper-case letters represent ANOVA analysis of plants grown on  
597 media with DMSO and ES20, respectively. Data represent mean  $\pm$  SD.  $n = 10$ .  
598 C and D. CESA6 point mutation E929K abolishes cell swollen phenotype  
599 caused by ES20 treatment. C. Representative root images of 5 days old Col-0  
600 and transgenic plants expressing wildtype or mutated CESA6 in *prc1-1*  
601 background treated with liquid  $\frac{1}{2}$  MS supplemented with DMSO (0.1%) or  
602 ES20 (3  $\mu$ M) for 20 hours. Scale bars: 100  $\mu$ m. D. Quantification on the root  
603 width of seedlings as shown in C. \*\*\* indicates  $p < 0.001$ , by two-tailed  
604 student's t test in comparison with DMSO treatment, while n.d indicates no  
605 significant difference. Data represent mean  $\pm$  SD.  $n = 15$ . E and F. The  
606 mutation E929K causes reduced sensitivity to the effect of ES20 treatment on

607 CSC localization. E. Representative images of PM-localized YFP-CESA6 and  
608 YFP-CESA6<sup>E929K</sup> after 30 min ES20 treatment. Scale bar: 5  $\mu$ m. F.  
609 Quantification on the density of PM localized CSC as shown in E. \*\*\* indicates  
610  $p < 0.001$ , by two-tailed student's t test in comparison with DMSO treatment,  
611 while n.d indicates no significant difference. Data represent mean  $\pm$  SE.  $n = 24$ .  
612

613 **Figure 8.** ES20 tolerance caused by CESA6 mutations is a semi-dominant trait.  
614 A. Representative seedlings of 5 days old Col-0 and transgenic lines  
615 expressing three different mutated CESA6 constructs (CESA6<sup>E929K</sup>,  
616 CESA6<sup>D396N</sup> and CESA6<sup>T783I</sup>) in Col-0 grown on  $\frac{1}{2}$  MS medium supplemented  
617 with DMSO (0.1%) and ES20 (1  $\mu$ M). Scale bars: 1 cm. B. Quantification on  
618 the root length of seedlings as shown in A. The letters indicate statistically  
619 significant differences determined by one-way ANOVA tests followed by  
620 Tukey's multiple comparison tests in different samples. Different letters  
621 indicate significant differences between groups ( $p < 0.05$ ). Data represent  
622 mean  $\pm$  SD.  $n = 10$ . ISO: isoxaben.

623  
624 **Figure 9.** Double mutant *ixr1-1;esr20r1* can tolerate cotreatment of ES20 and  
625 isoxaben. A and B. *ixr1-1;esr20r1* seedlings exhibits reduced sensitivity to the  
626 mixture of ES20 and isoxaben. A. Representative seedlings of 5 days old  
627 SYP61-CFP, Col-0, *esr20r1*, *ixr1-1* and *esr20r1;ixr1-1* grown on  $\frac{1}{2}$  MS medium  
628 supplemented with DMSO (0.1%), ES20 (1  $\mu$ M), isoxaben (12 nM) and the  
629 mixture of ES20 (1  $\mu$ M) and isoxaben (12 nM). Scale bars: 1 cm. B.  
630 Quantification on the root length of seedlings as shown in A. The letters  
631 indicate statistically significant differences determined by one-way ANOVA  
632 tests followed by Tukey's multiple comparison tests in different samples.  
633 Different letters indicate significant differences between groups ( $p < 0.05$ ).  
634 Data represent mean  $\pm$  SD.  $n = 15$ . C. The rosettes of 3 weeks old SYP61-CFP,  
635 Col-0, *esr20r1*, *ixr1-1* and *esr20r1;ixr1-1* grown on soil. Scale bar: 1 cm. D.  
636 Quantification on the size of rosettes in 3 weeks old soil grown plants as

637 shown in C. Rosette size was measured as the sum of the lengths of the  
638 longest leaf and second longest leaf. Data represent mean  $\pm$  SD. n = 9. The  
639 letters indicate statistically significant differences determined by one-way  
640 ANOVA tests followed by Tukey's multiple comparison tests in different  
641 samples. Different letters indicate significant differences between groups ( $p <$   
642 0.05). E. Representative plants of 40 days old soil grown SYP61-CFP, Col-0,  
643 *es20r1*, *ixr1-1* and *es20r1;ixr1-1*. Scale bars: 3 cm. F. Quantification on the  
644 height of 40 days soil grown plants as shown in E. Data represent mean  $\pm$  SD.  
645 n = 8. The letters indicate statistically significant differences determined by  
646 one-way ANOVA tests followed by Tukey's multiple comparison tests in  
647 different samples. Different letters indicate significant differences between  
648 groups ( $p <$  0.05).

649

650 **Figure 10.** Spraying ES20 inhibits the growth of soil grown Arabidopsis Col-0.  
651 Arabidopsis Col-0 grown on soil sprayed with DMSO (0.5%) (left) and ES20  
652 (500  $\mu$ M) (right). Images were taken at 7 days after spraying. Scale bars: 1 cm.

653

#### 654 **References:**

655 **Arioli T, Peng L, Betzner AS, Burn J, Wittke W, Herth W, Camilleri C, Hofte**  
656 **H, Plazinski J, Birch R, Cork A, Glover J, Redmond J, Williamson**  
657 **RE** (1998) Molecular analysis of cellulose biosynthesis in Arabidopsis.  
658 *Science* **279**: 717-720

659 **Bashline L, Li S, Anderson CT, Lei L, Gu Y** (2013) The endocytosis of  
660 cellulose synthase in Arabidopsis is dependent on mu2, a  
661 clathrin-mediated endocytosis adaptin. *Plant Physiol* **163**: 150-160

662 **Brabham C, Lei L, Gu Y, Stork J, Barrett M, DeBolt S** (2014) Indaziflam  
663 herbicidal action: a potent cellulose biosynthesis inhibitor. *Plant Physiol*  
664 **166**: 1177-1185

665 **Bringmann M, Li E, Sampathkumar A, Kocabek T, Hauser MT, Persson S**  
666 (2012) POM-POM2/cellulose synthase interacting1 is essential for the  
667 functional association of cellulose synthase and microtubules in  
668 Arabidopsis. *Plant Cell* **24**: 163-177

669 **Brinkmeyer RS, Terando NH, Waldrep TW, Burow KW** (1989) The  
670 Synthesis and Biological-Activity of Heterocyclic-Analogs of the  
671 Broadleaf Herbicide Isoxaben. Abstracts of Papers of the American  
672 Chemical Society **197**: 56-Agro

- 673 **Clough SJ, Bent AF** (1998) Floral dip: a simplified method for  
674 Agrobacterium-mediated transformation of *Arabidopsis thaliana*. *Plant J*  
675 **16**: 735-743
- 676 **Crowell EF, Bischoff V, Desprez T, Rolland A, Stierhof YD, Schumacher K,**  
677 **Gonneau M, Hofte H, Vernhettes S** (2009) Pausing of Golgi bodies on  
678 microtubules regulates secretion of cellulose synthase complexes in  
679 *Arabidopsis*. *Plant Cell* **21**: 1141-1154
- 680 **DeBolt S, Gutierrez R, Ehrhardt DW, Melo CV, Ross L, Cutler SR,**  
681 **Somerville C, Bonetta D** (2007) Morlin, an inhibitor of cortical  
682 microtubule dynamics and cellulose synthase movement. *Proc Natl*  
683 *Acad Sci U S A* **104**: 5854-5859
- 684 **Delye C, Jasieniuk M, Le Corre V** (2013) Deciphering the evolution of  
685 herbicide resistance in weeds. *Trends Genet* **29**: 649-658
- 686 **Desprez T, Juraniec M, Crowell EF, Jouy H, Pochylova Z, Parcy F, Hofte H,**  
687 **Gonneau M, Vernhettes S** (2007) Organization of cellulose synthase  
688 complexes involved in primary cell wall synthesis in *Arabidopsis*  
689 *thaliana*. *Proc Natl Acad Sci U S A* **104**: 15572-15577
- 690 **Desprez T, Vernhettes S, Fagard M, Refregier G, Desnos T, Aletti E, Py N,**  
691 **Pelletier S, Hofte H** (2002) Resistance against herbicide isoxaben and  
692 cellulose deficiency caused by distinct mutations in same cellulose  
693 synthase isoform CESA6. *Plant Physiol* **128**: 482-490
- 694 **Doblin MS, Kurek I, Jacob-Wilk D, Delmer DP** (2002) Cellulose biosynthesis  
695 in plants: from genes to rosettes. *Plant Cell Physiol* **43**: 1407-1420
- 696 **Endler A, Kesten C, Schneider R, Zhang Y, Ivakov A, Froehlich A, Funke**  
697 **N, Persson S** (2015) A Mechanism for Sustained Cellulose Synthesis  
698 during Salt Stress. *Cell* **162**: 1353-1364
- 699 **Fernandes AN, Thomas LH, Altaner CM, Callow P, Forsyth VT, Apperley**  
700 **DC, Kennedy CJ, Jarvis MC** (2011) Nanostructure of cellulose  
701 microfibrils in spruce wood. *Proc Natl Acad Sci U S A* **108**: E1195-1203
- 702 **Fujita M, Himmelspach R, Ward J, Whittington A, Hasenbein N, Liu C,**  
703 **Truong TT, Galway ME, Mansfield SD, Hocart CH, Wasteneys GO**  
704 (2013) The anisotropy1 D604N mutation in the *Arabidopsis* cellulose  
705 synthase1 catalytic domain reduces cell wall crystallinity and the  
706 velocity of cellulose synthase complexes. *Plant Physiol* **162**: 74-85
- 707 **Gianessi LP** (2013) The increasing importance of herbicides in worldwide  
708 crop production. *Pest Manag Sci* **69**: 1099-1105
- 709 **Giddings TH, Jr., Brower DL, Staehelin LA** (1980) Visualization of particle  
710 complexes in the plasma membrane of *Micrasterias denticulata*  
711 associated with the formation of cellulose fibrils in primary and  
712 secondary cell walls. *J Cell Biol* **84**: 327-339
- 713 **Gonneau M, Desprez T, Guillot A, Vernhettes S, Hofte H** (2014) Catalytic  
714 subunit stoichiometry within the cellulose synthase complex. *Plant*  
715 *Physiol* **166**: 1709-1712
- 716 **Gu Y, Kaplinsky N, Bringmann M, Cobb A, Carroll A, Sampathkumar A,**



- 717 **Baskin TI, Persson S, Somerville CR** (2010) Identification of a  
718 cellulose synthase-associated protein required for cellulose  
719 biosynthesis. *Proc Natl Acad Sci U S A* **107**: 12866-12871
- 720 **Gutierrez R, Lindeboom JJ, Paredes AR, Emons AM, Ehrhardt DW** (2009)  
721 Arabidopsis cortical microtubules position cellulose synthase delivery to  
722 the plasma membrane and interact with cellulose synthase trafficking  
723 compartments. *Nat Cell Biol* **11**: 797-806
- 724 **Haigler CH, Brown RMJ** (1986) Transport of rosettes from the Golgi  
725 apparatus to the plasma membrane in isolated mesophyll cells of *Zinnia*  
726 *elegans* during differentiation to tracheary elements in suspension  
727 culture. *Protoplasma* **134**: 111-120
- 728 **Harris DM, Corbin K, Wang T, Gutierrez R, Bertolo AL, Petti C, Smilgies**  
729 **DM, Estevez JM, Bonetta D, Urbanowicz BR, Ehrhardt DW,**  
730 **Somerville CR, Rose JK, Hong M, Debolt S** (2012) Cellulose  
731 microfibril crystallinity is reduced by mutating C-terminal  
732 transmembrane region residues CESA1A903V and CESA3T942I of  
733 cellulose synthase. *Proc Natl Acad Sci U S A* **109**: 4098-4103
- 734 **Heap I** (2014) Global perspective of herbicide-resistant weeds. *Pest Manag*  
735 *Sci* **70**: 1306-1315
- 736 **Heim DR, Skomp JR, Tschabold EE, Larrinua IM** (1990) Isoxaben Inhibits  
737 the Synthesis of Acid Insoluble Cell-Wall Materials in  
738 Arabidopsis-Thaliana. *Plant Physiology* **93**: 695-700
- 739 **Hill JL, Jr., Hammudi MB, Tien M** (2014) The Arabidopsis cellulose synthase  
740 complex: a proposed hexamer of CESA trimers in an equimolar  
741 stoichiometry. *Plant Cell* **26**: 4834-4842
- 742 **Hu H, Zhang R, Tao Z, Li X, Li Y, Huang J, Li X, Han X, Feng S, Zhang G,**  
743 **Peng L** (2018) Cellulose Synthase Mutants Distinctively Affect Cell  
744 Growth and Cell Wall Integrity for Plant Biomass Production in  
745 Arabidopsis. *Plant Cell Physiol* **59**: 1144-1157
- 746 **Hu Z, Vanderhaeghen R, Cools T, Wang Y, De Clercq I, Leroux O, Nguyen**  
747 **L, Belt K, Millar AH, Audenaert D, Hilson P, Small I, Mouille G,**  
748 **Vernhettes S, Van Breusegem F, Whelan J, Hofte H, De Veylder L**  
749 (2016) Mitochondrial Defects Confer Tolerance against Cellulose  
750 Deficiency. *Plant Cell* **28**: 2276-2290
- 751 **Hu Z, Zhang T, Rombaut D, Decaestecker W, Xing A, D'Haeyer S, Hofer R,**  
752 **Vercauteren I, Karimi M, Jacobs TB, De Veylder L** (2019)  
753 Genome-Editing Based Engineering of CESA3 Dual Cellulose-Inhibitor  
754 Resistant Plants. *Plant Physiol* **180**: 827-836
- 755 **Huang L, Li X, Zhang W, Ung N, Liu N, Yin X, Li Y, Mcewan RE, Dilkes B,**  
756 **Dai M, Hicks GR, Raikhel NV, Staiger CJ, Zhang C** (2020)  
757 Endosidin20 targets cellulose synthase catalytic domain to inhibit  
758 cellulose biosynthesis.
- 759 **Huggenberger F, Gueguen F** (1987) Yield Response to Preemergence  
760 Control of Broad-Leaved Weeds in Winter Cereals with Isoxaben in

- 761 France. *Crop Protection* **6**: 75-81
- 762 **Jamet P, Thoisydur JC** (1988) Pesticide Mobility in Soils - Assessment of the  
763 Movement of Isoxaben by Soil Thin-Layer Chromatography. *Bulletin of*  
764 *Environmental Contamination and Toxicology* **41**: 135-142
- 765 **Lei L, Li S, Gu Y** (2012) Cellulose synthase interactive protein 1 (CS11)  
766 mediates the intimate relationship between cellulose microfibrils and  
767 cortical microtubules. *Plant Signal Behav* **7**: 714-718
- 768 **Mueller SC, Brown RM, Jr.** (1980) Evidence for an intramembrane  
769 component associated with a cellulose microfibril-synthesizing complex  
770 in higher plants. *J Cell Biol* **84**: 315-326
- 771 **Mueller SC, Brown RM, Jr., Scott TK** (1976) Cellulosic microfibrils: nascent  
772 stages of synthesis in a higher plant cell. *Science* **194**: 949-951
- 773 **Newman RH, Hill SJ, Harris PJ** (2013) Wide-angle x-ray scattering and  
774 solid-state nuclear magnetic resonance data combined to test models  
775 for cellulose microfibrils in mung bean cell walls. *Plant Physiol* **163**:  
776 1558-1567
- 777 **Paredes AR, Somerville CR, Ehrhardt DW** (2006) Visualization of cellulose  
778 synthase demonstrates functional association with microtubules.  
779 *Science* **312**: 1491-1495
- 780 **Pear JR, Kawagoe Y, Schreckengost WE, Delmer DP, Stalker DM** (1996)  
781 Higher plants contain homologs of the bacterial celA genes encoding  
782 the catalytic subunit of cellulose synthase. *Proc Natl Acad Sci U S A* **93**:  
783 12637-12642
- 784 **Persson S, Paredes A, Carroll A, Palsdottir H, Doblin M, Poindexter P,**  
785 **Khitrov N, Auer M, Somerville CR** (2007) Genetic evidence for three  
786 unique components in primary cell-wall cellulose synthase complexes in  
787 Arabidopsis. *Proc Natl Acad Sci U S A* **104**: 15566-15571
- 788 **Peterson MA, McMaster SA, Riechers DE, Skelton J, Stahlman PW** (2016)  
789 2,4-D Past, Present, and Future: A Review. *Weed Technology* **30**:  
790 303-345
- 791 **Polko JK, Barnes WJ, Voiniciuc C, Doctor S, Steinwand B, Hill JL, Jr.,**  
792 **Tien M, Pauly M, Anderson CT, Kieber JJ** (2018) SHOU4 Proteins  
793 Regulate Trafficking of Cellulose Synthase Complexes to the Plasma  
794 Membrane. *Curr Biol* **28**: 3174-3182 e3176
- 795 **Sampathkumar A, Gutierrez R, McFarlane HE, Bringmann M, Lindeboom**  
796 **J, Emons AM, Samuels L, Ketelaar T, Ehrhardt DW, Persson S**  
797 (2013) Patterning and lifetime of plasma membrane-localized cellulose  
798 synthase is dependent on actin organization in Arabidopsis interphase  
799 cells. *Plant Physiol* **162**: 675-688
- 800 **Scheible WR, Eshed R, Richmond T, Delmer D, Somerville C** (2001)  
801 Modifications of cellulose synthase confer resistance to isoxaben and  
802 thiazolidinone herbicides in Arabidopsis *lxr1* mutants. *Proceedings of*  
803 *the National Academy of Sciences of the United States of America* **98**:  
804 10079-10084

- 805 **Shim I, Law R, Kileeg Z, Stronghill P, Northey JGB, Strap JL, Bonetta DT**  
806 (2018) Alleles Causing Resistance to Isoxaben and Flupoxam Highlight  
807 the Significance of Transmembrane Domains for CESA Protein  
808 Function. *Front Plant Sci* **9**: 1152
- 809 **Tateno M, Brabham C, DeBolt S** (2016) Cellulose biosynthesis inhibitors - a  
810 multifunctional toolbox. *J Exp Bot* **67**: 533-542
- 811 **Taylor NG, Howells RM, Huttly AK, Vickers K, Turner SR** (2003)  
812 Interactions among three distinct Cesa proteins essential for cellulose  
813 synthesis. *Proc Natl Acad Sci U S A* **100**: 1450-1455
- 814 **Worden N, Wilkop TE, Esteve VE, Jeannotte R, Lathe R, Vernhettes S,**  
815 **Weimer B, Hicks G, Alonso J, Labavitch J, Persson S, Ehrhardt D,**  
816 **Drakakaki G** (2015) CESA trafficking inhibitor inhibits cellulose  
817 deposition and interferes with the trafficking of cellulose synthase  
818 complexes and their associated proteins KORRIGAN1 and  
819 POM2/CELLULOSE SYNTHASE INTERACTIVE PROTEIN1. *Plant*  
820 *Physiol* **167**: 381-393
- 821 **Zhang W, Cai C, Staiger CJ** (2019) Myosins XI Are Involved in Exocytosis of  
822 Cellulose Synthase Complexes. *Plant Physiol* **179**: 1537-1555
- 823 **Zhang Y, Nikolovski N, Sorieul M, Vellosillo T, McFarlane HE, Dupree R,**  
824 **Kesten C, Schneider R, Driemeier C, Lathe R, Lampugnani E, Yu X,**  
825 **Ivakov A, Doblin MS, Mortimer JC, Brown SP, Persson S, Dupree P**  
826 (2016) Golgi-localized STELLO proteins regulate the assembly and  
827 trafficking of cellulose synthase complexes in Arabidopsis. *Nat*  
828 *Commun* **7**: 11656
- 829 **Zhu X, Li S, Pan S, Xin X, Gu Y** (2018) CSI1, PATROL1, and exocyst complex  
830 cooperate in delivery of cellulose synthase complexes to the plasma  
831 membrane. *Proc Natl Acad Sci U S A* **115**: E3578-E3587
- 832

**Figure 1.**

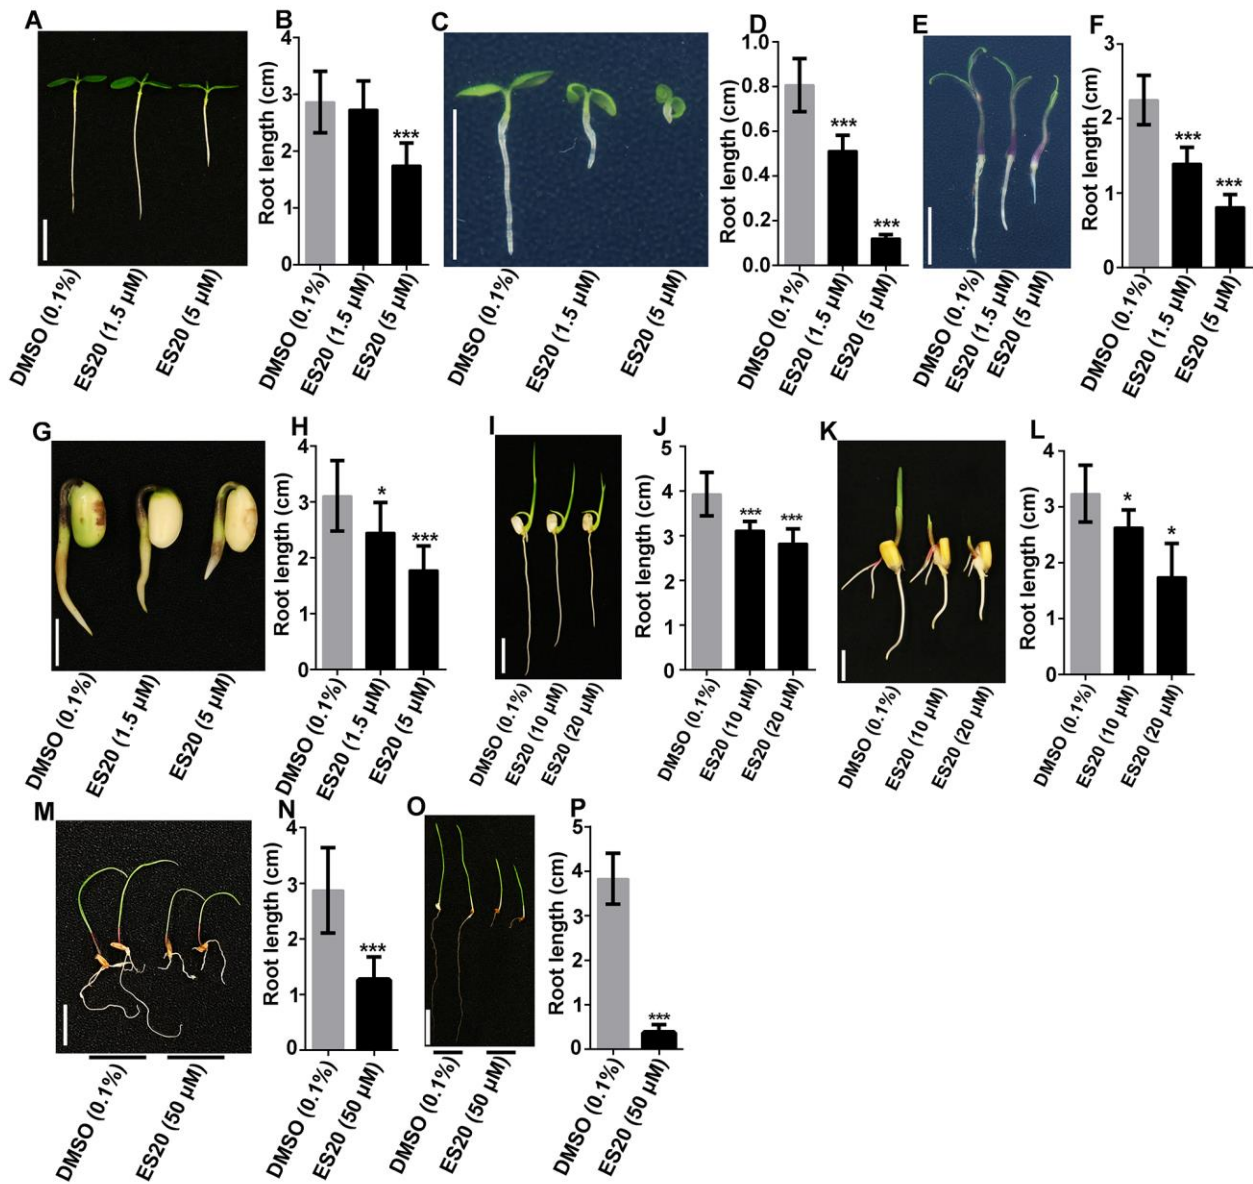

**Figure 1.** ES20 is a broad-spectrum plant growth inhibitor. A. representative seedlings of 5 days old dandelion (A), tobacco (C), tomato (E), soybean (G), rice (I), maize (K), perennial ryegrass (M) and Kentucky bluegrass (O) treated with DMSO (0.1%) and indicated concentration of ES20. Perennial ryegrass and Kentucky bluegrass seeds were soaked in sterile water supplemented with DMSO (0.1%) or ES20 (50 μM), whereas other plants' seeds were grown on solid ½ MS growth medium supplemented with DMSO (0.1%) or indicated concentration of ES20. Scale bars: 1 cm. B, D, F, H, J, L, N and P, quantification of root length of A, C, E, G, I, K, M and O, respectively. \* indicates p < 0.05 and \*\*\* indicates p < 0.001, by two-tailed student's *t* test in

comparison with DMSO treatment. Data represent mean  $\pm$  SD. n= 10, 15, 10, 8, 12, 10, 10, 9 for panels B, D, F, H, J, L, N and P, respectively.

**Figure 2.**

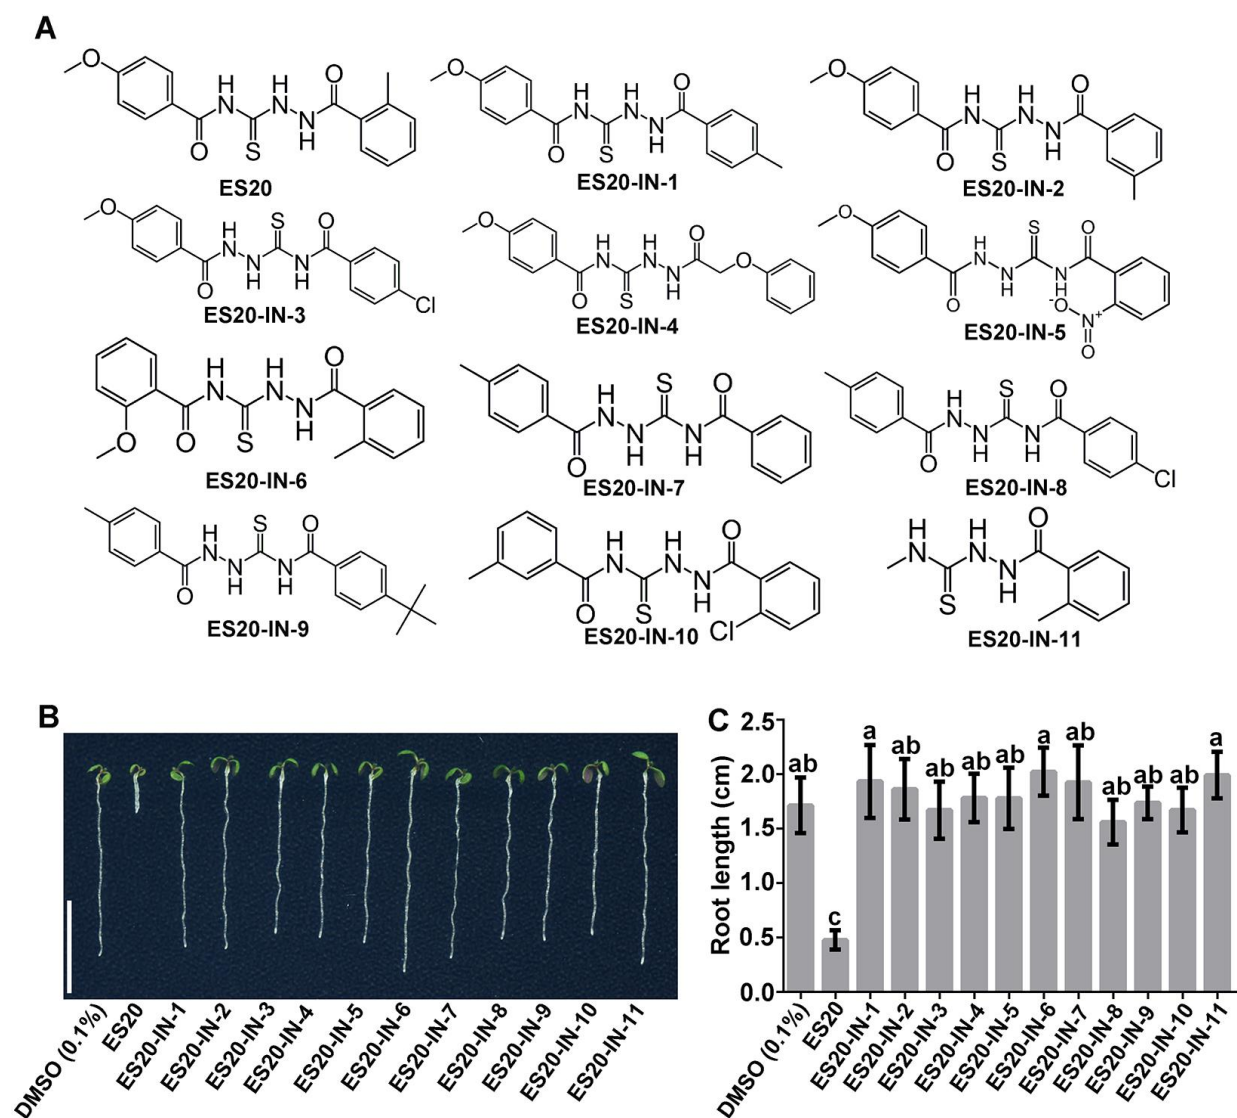

**Figure 2.** Structure activity relationship analysis of ES20. A. Chemical structures of ES20 and 11 analogs. B. 5 days old representative *Arabidopsis Col-0* seedlings grew on  $\frac{1}{2}$  MS growth medium supplemented with DMSO (0.1%) or 1  $\mu$ M different analogs. Scale bar: 1 cm. C. Quantification of root length of seedlings shown in B. Data represent mean  $\pm$  SD.  $n = 10$ . The letters indicate statistically significant differences determined by one-way ANOVA tests followed by Tukey's multiple comparison tests in different samples. Different letters indicate significant differences between groups ( $p < 0.05$ ).

**Figure 3.**

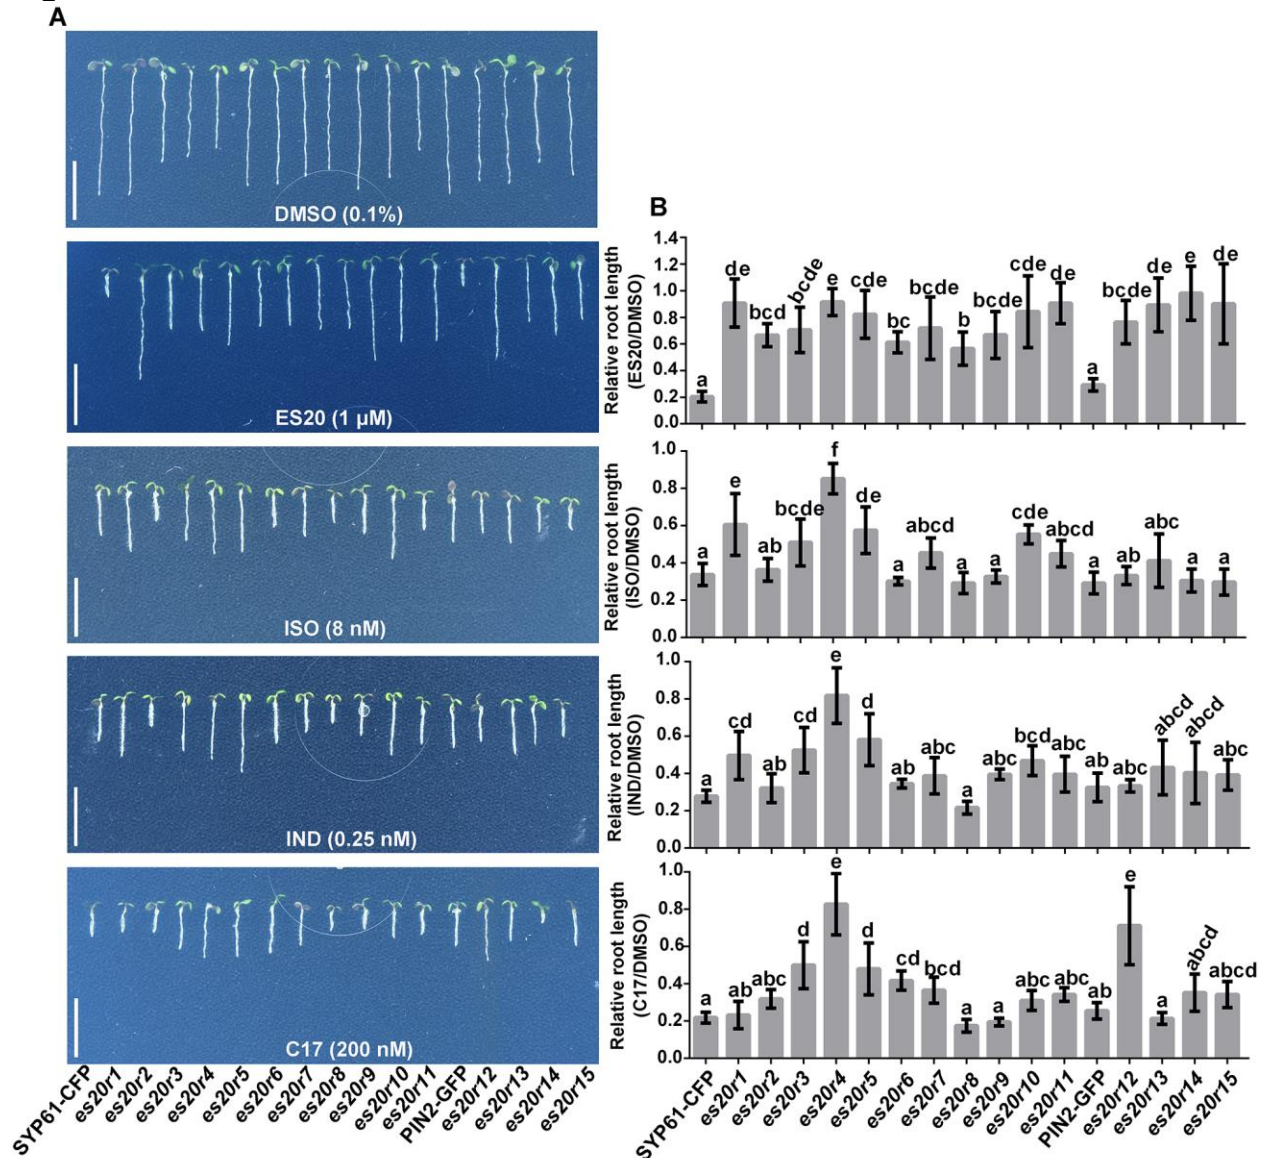

**Figure 3.** The growth of *es20rs* in the presence of isoxaben, indaziflam and C17. A. Representative seedlings of 5 days old *es20rs* grown on  $\frac{1}{2}$  MS medium supplemented with DMSO (0.1%), ES20 (1  $\mu$ M), isoxaben (8 nM), indaziflam (0.25 nM) or C17 (200 nM). Scale bars: 1 cm. B. Quantification of the relative root length of seedlings as shown in A. The letters indicate statistically significant differences determined by one-way ANOVA tests followed by Tukey's multiple comparison tests in different samples. Different letters indicate significant differences between groups ( $p < 0.05$ ). Data represent mean  $\pm$  SD.  $n = 12$ . ISO: isoxaben. IND: indaziflam.

**Figure 4.**

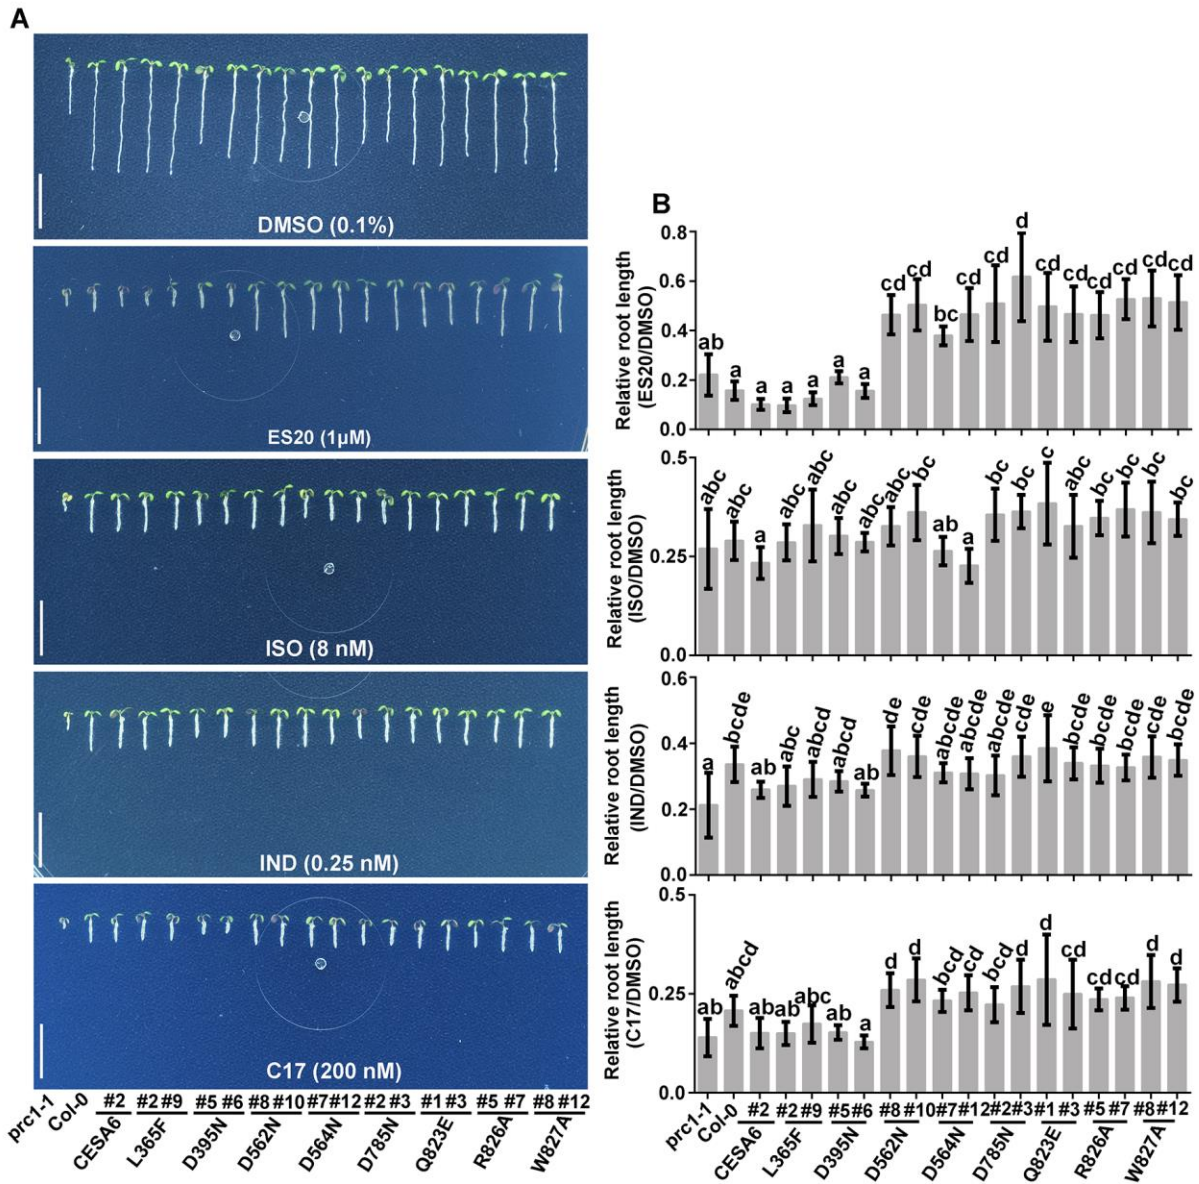

**Figure 4.** Plants expressing CESA6 carrying predicted mutations at the modeled binding site are sensitive to isoxaben, indaziflam and C17. A. 5 days old representative seedlings of *prc1-1/cesa6* complemented with wild type CESA6 or mutated CESA6 carrying predicted mutations at modeled catalytic site grown on  $\frac{1}{2}$  MS medium supplemented with DMSO (0.1%), ES20 (1  $\mu$ M), isoxaben (8 nM), indaziflam (0.25 nM) or C17 (200 nM). Scale bars: 1 cm. B. Quantification of the relative root length of seedlings as mentioned in A. The letters indicate statistically significant differences determined by one-way ANOVA tests followed by Tukey's multiple comparison tests in



different samples. Different letters indicate significant differences between groups ( $p < 0.05$ ). Data represent mean  $\pm$  SD. n = 12. ISO: isoxaben. IND: indaziflam.

Figure 5.

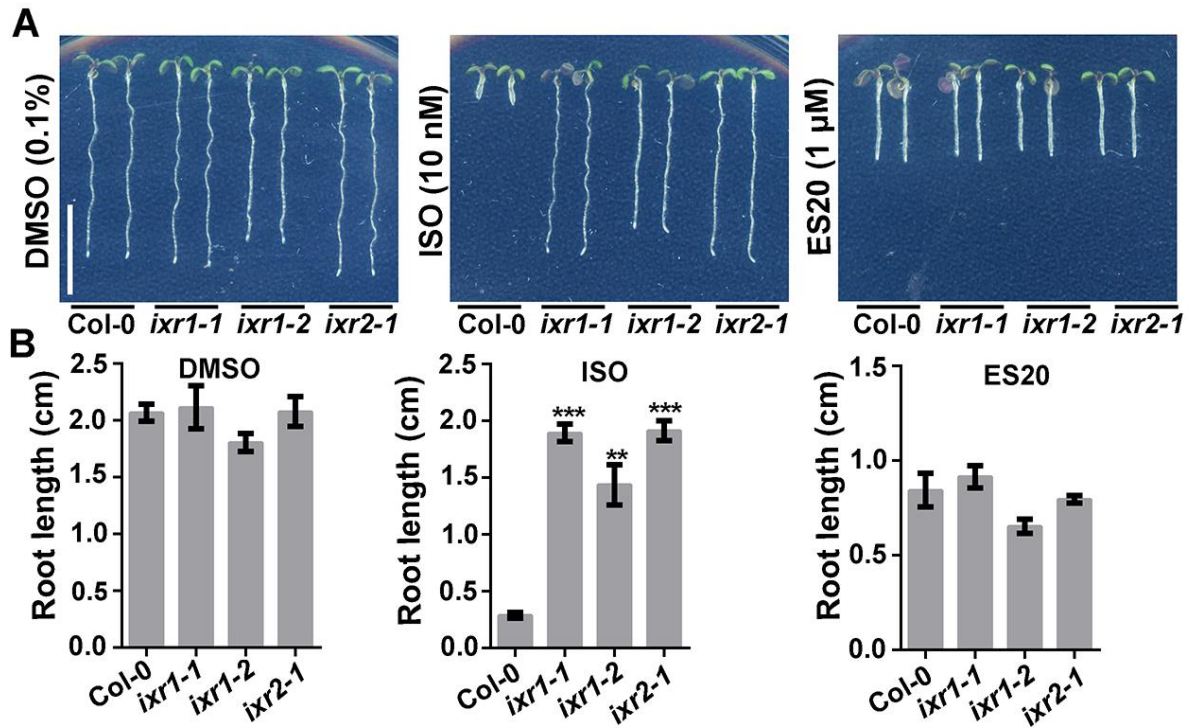

**Figure 5.** Isoxaben insensitive mutants are sensitive to ES20. A. Representative seedlings of 5 days old Col-0 and three isoxaben insensitive mutants (*ixr1-1*, *ixr1-2* and *ixr2-1*) grown on ½ MS growth medium supplemented with DMSO (0.1%), isoxaben (10 nM) or ES20 (1 μM). Scale bar: 1 cm. B. Quantification of root length of seedlings as shown in A. \*\* indicates  $p < 0.01$ , \*\*\* indicates  $p < 0.001$ , by two-tailed student's t test in comparison with Col-0. Data represent mean  $\pm$  SD.  $n = 9$ . ISO: isoxaben.

**Figure 6.**

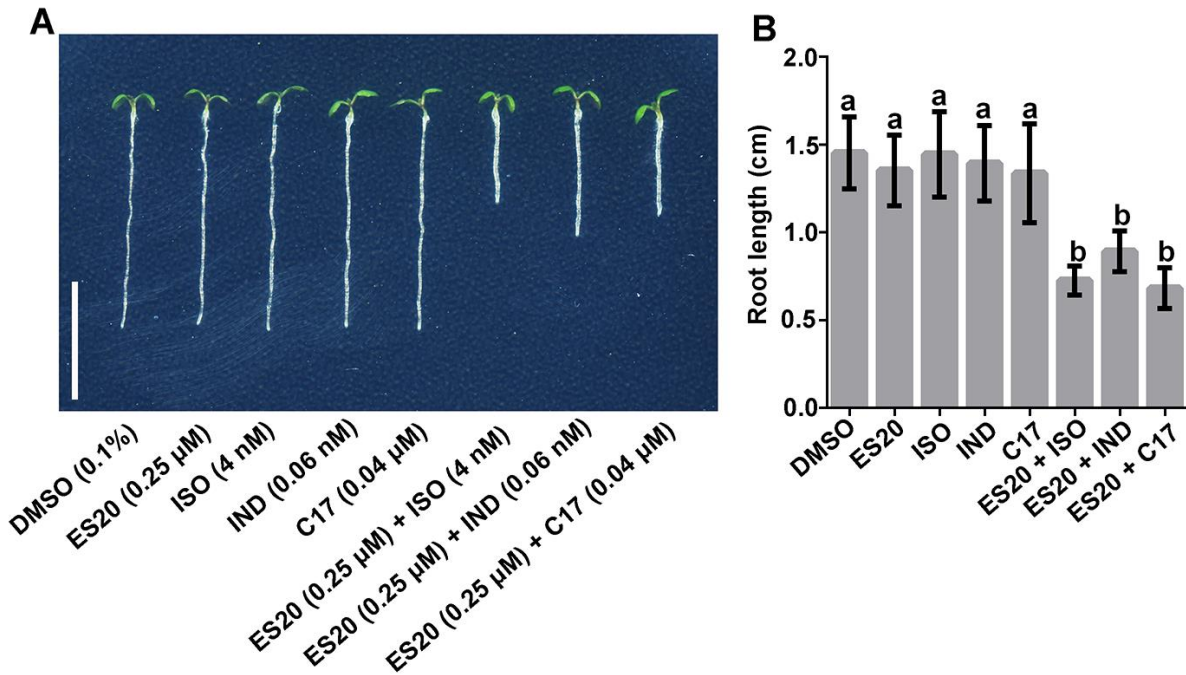

**Figure 6.** ES20 has synergistic inhibition effect on root growth with isoxaben, indaziflam and C17. A. Representative seedlings of 5 days old Col-0 grown on  $\frac{1}{2}$  MS medium supplemented with DMSO (0.1%), ES20 (0.25  $\mu$ M), isoxaben (4 nM), indaziflam (0.06 nM), C17 (0.04  $\mu$ M) and a mixture of ES20 (0.25  $\mu$ M) with three other inhibitors. Scale bar: 1 cm. B. Quantification on the root length of seedlings as shown in A. The letters indicate statistically significant differences determined by one-way ANOVA tests followed by Tukey's multiple comparison tests in different samples. Different letters indicate significant differences between groups ( $p < 0.05$ ). Data represent mean  $\pm$  SD.  $n = 15$ . ISO: isoxaben. IND: indaziflam.

**Figure 7.**

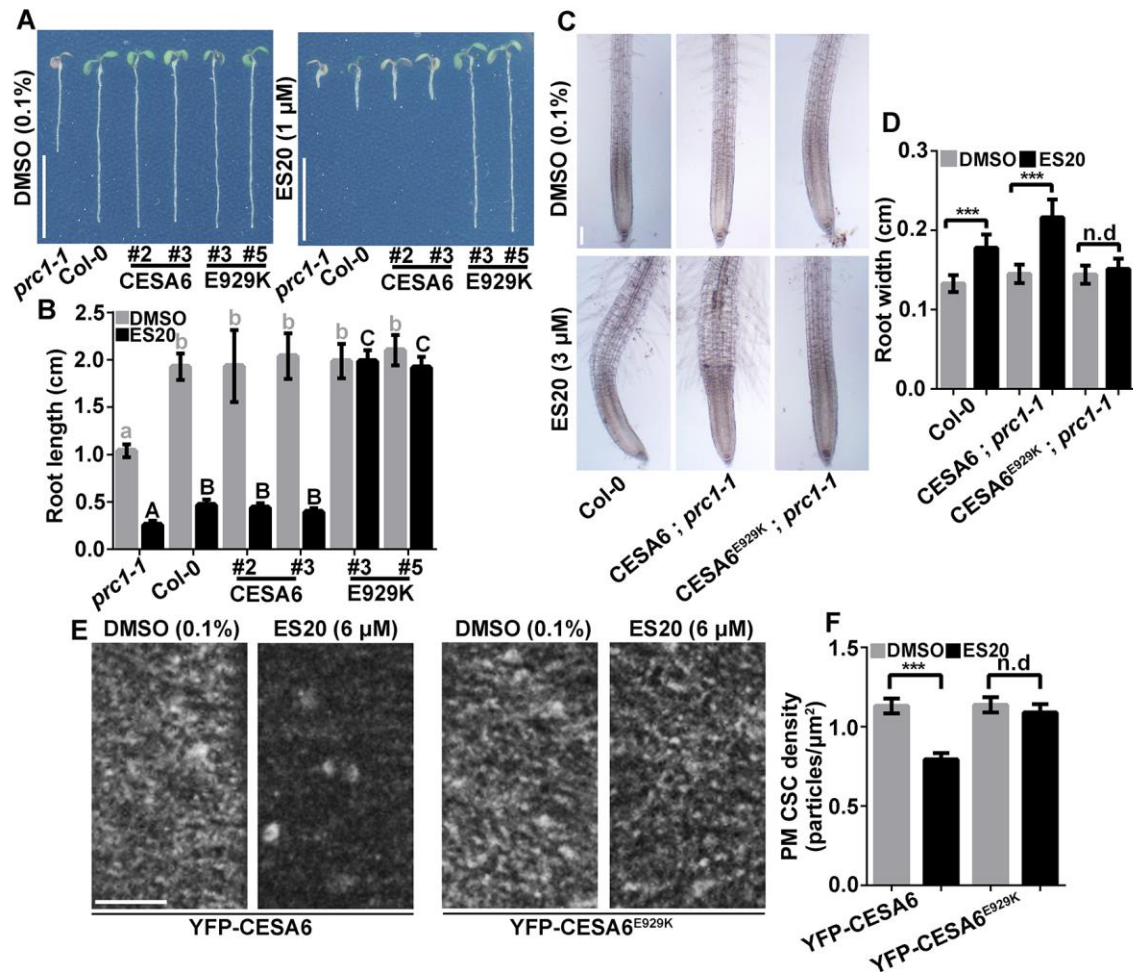

**Figure 7.** CESA6 point mutation E929K abolishes ES20's inhibitory effect on root growth and on the depletion of CSC localization at the PM. A. Representative seedlings of 5 days old *prc1-1*, Col-0 and *prc1-1* complemented with wild type or mutated CESA6 constructs grown on the ½ MS medium supplemented with DMSO (0.1%) or ES20 (1 μM). Scale bars: 1 cm. B. Quantification on the root length of seedlings as shown in A. The letters indicate statistically significant differences determined by one-way ANOVA tests followed by Tukey's multiple comparison tests in different samples. Different letters indicate significant differences between groups ( $p < 0.05$ ). Lower- and upper-case letters represent ANOVA analysis of plants grown on media with DMSO and ES20, respectively. Data represent mean  $\pm$  SD.  $n = 10$ . C and D. CESA6 point mutation E929K abolishes cell swollen phenotype caused by ES20 treatment. C. Representative root images of 5 days old Col-0 and transgenic plants expressing wildtype or mutated

CESA6 in *prc1-1* background treated with liquid ½ MS supplemented with DMSO (0.1%) or ES20 (3 µM) for 20 hours. Scale bars: 100 µm. D. Quantification on the root width of seedlings as shown in C. \*\*\* indicates  $p < 0.001$ , by two-tailed student's t test in comparison with DMSO treatment, while n.d indicates no significant difference. Data represent mean  $\pm$  SD.  $n = 15$ . E and F. The mutation E929K causes reduced sensitivity to the effect of ES20 treatment on CSC localization. E. Representative images of PM-localized YFP-CESA6 and YFP-CESA6<sup>E929K</sup> after 30 min ES20 treatment. Scale bar: 5 µm. F. Quantification on the density of PM localized CSC as shown in E. \*\*\* indicates  $p < 0.001$ , by two-tailed student's t test in comparison with DMSO treatment, while n.d indicates no significant difference. Data represent mean  $\pm$  SE.  $n = 24$ .

Figure 8.

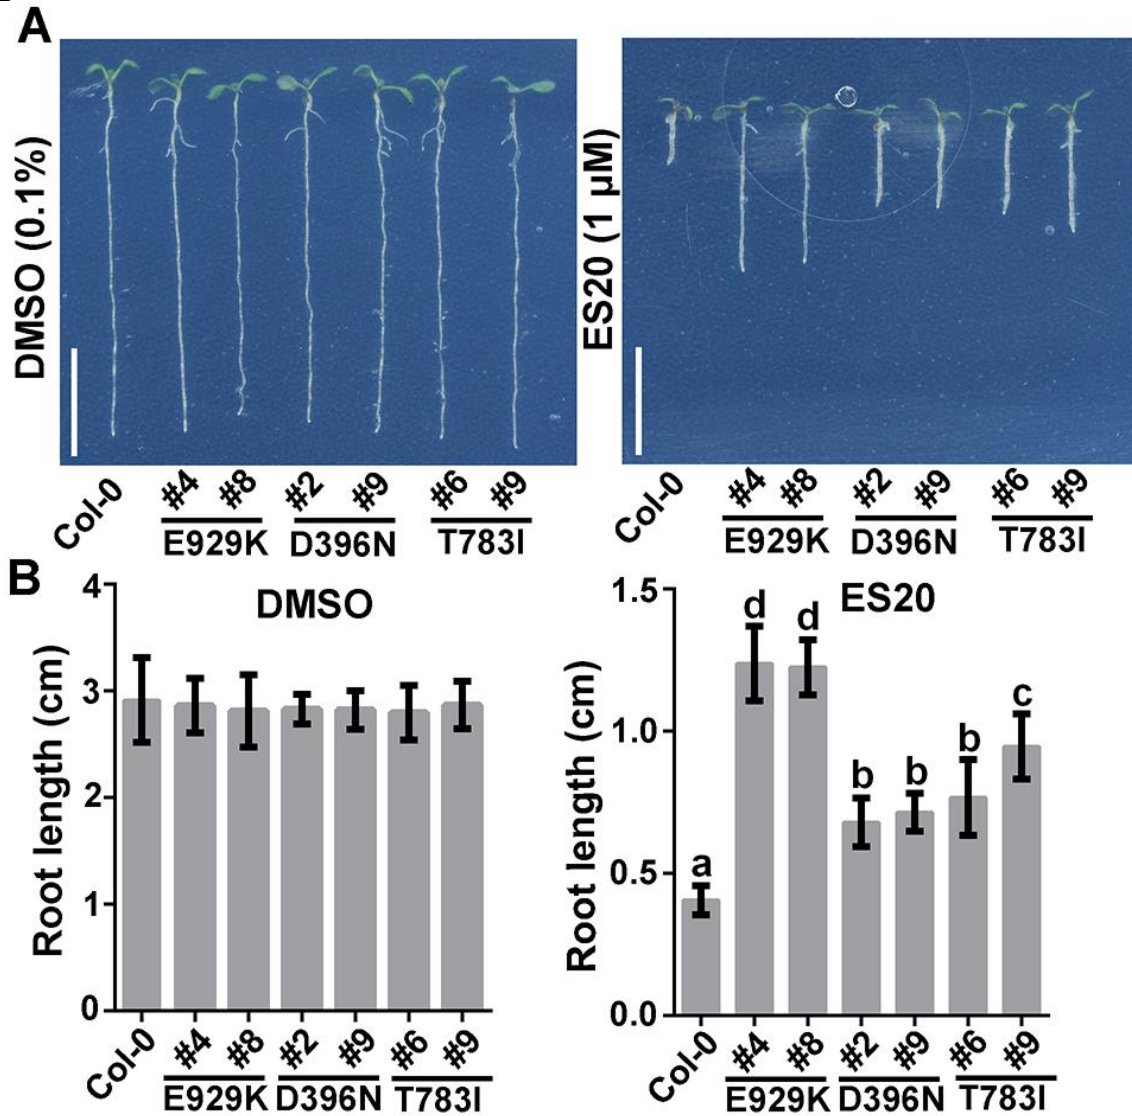

**Figure 8.** ES20 tolerance caused by CESA6 mutations is a semi-dominant trait. A. Representative seedlings of 5 days old Col-0 and transgenic lines expressing three different mutated CESA6 constructs (CESA6<sup>E929K</sup>, CESA6<sup>D396N</sup> and CESA6<sup>T783I</sup>) in Col-0 grown on ½ MS medium supplemented with DMSO (0.1%) and ES20 (1 μM). Scale bars: 1 cm. B. Quantification on the root length of seedlings as shown in A. The letters indicate statistically significant differences determined by one-way ANOVA tests followed by Tukey's multiple comparison tests in different samples. Different letters indicate significant differences between groups ( $p < 0.05$ ). Data represent mean  $\pm$  SD.  $n = 10$ .

**Figure 9.**

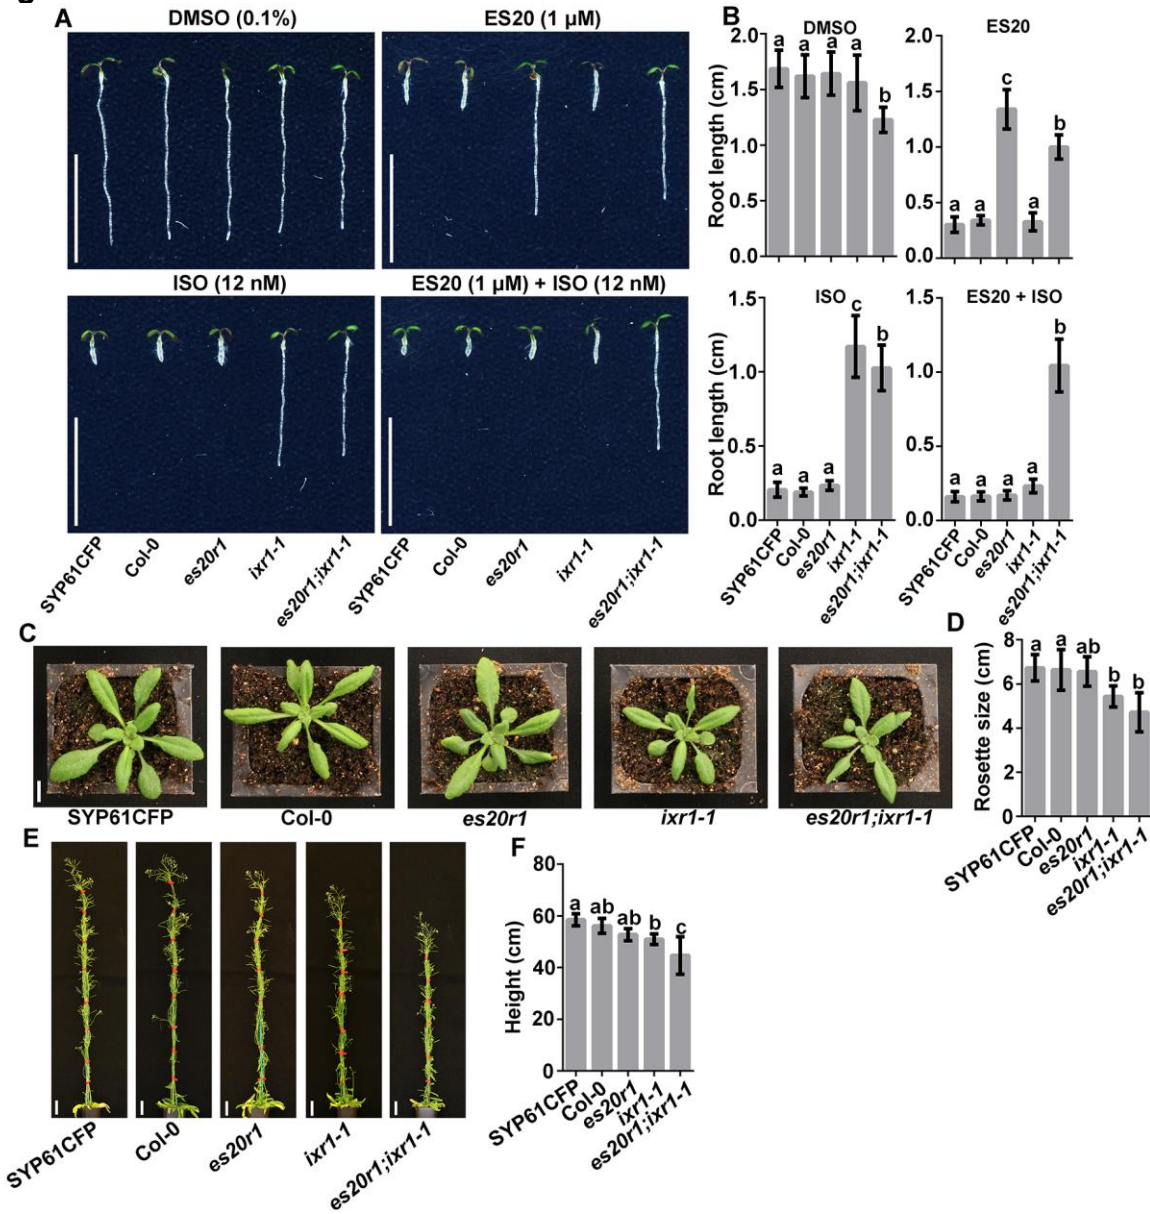

**Figure 9.** Double mutant *ixr1-1;esr20r1* can tolerate cotreatment of ES20 and isoxaben. A and B. *ixr1-1;es20r1* seedlings exhibits reduced sensitivity to the mixture of ES20 and isoxaben. A. Representative seedlings of 5 days old SYP61-CFP, Col-0, *es20r1*, *ixr1-1* and *es20r1;ixr1-1* grown on ½ MS medium supplemented with DMSO (0.1%), ES20 (1 μM), isoxaben (12 nM) and the mixture of ES20 (1 μM) and isoxaben (12 nM). Scale bars: 1 cm. B. Quantification on the root length of seedlings as shown in A. The letters indicate statistically significant differences determined by one-way ANOVA tests followed by Tukey's multiple comparison tests in different samples. Different letters

indicate significant differences between groups ( $p < 0.05$ ). Data represent mean  $\pm$  SD.  $n = 15$ . C. The rosettes of 3 weeks old SYP61-CFP, Col-0, *es20r1*, *ixr1-1* and *es20r1;ixr1-1* grown on soil. Scale bar: 1 cm. D. Quantification on the size of rosettes in 3 weeks old soil grown plants as shown in C. Rosette size was measured as the sum of the lengths of the longest leaf and second longest leaf. Data represent mean  $\pm$  SD.  $n = 9$ . The letters indicate statistically significant differences determined by one-way ANOVA tests followed by Tukey's multiple comparison tests in different samples. Different letters indicate significant differences between groups ( $p < 0.05$ ). E. Representative plants of 40 days old soil grown SYP61-CFP, Col-0, *es20r1*, *ixr1-1* and *es20r1;ixr1-1*. Scale bars: 3 cm. F. Quantification on the height of 40 days soil grown plants as shown in E. Data represent mean  $\pm$  SD.  $n = 8$ . The letters indicate statistically significant differences determined by one-way ANOVA tests followed by Tukey's multiple comparison tests in different samples. Different letters indicate significant differences between groups ( $p < 0.05$ ). ISO: isoxaben.



**Figure 10.**

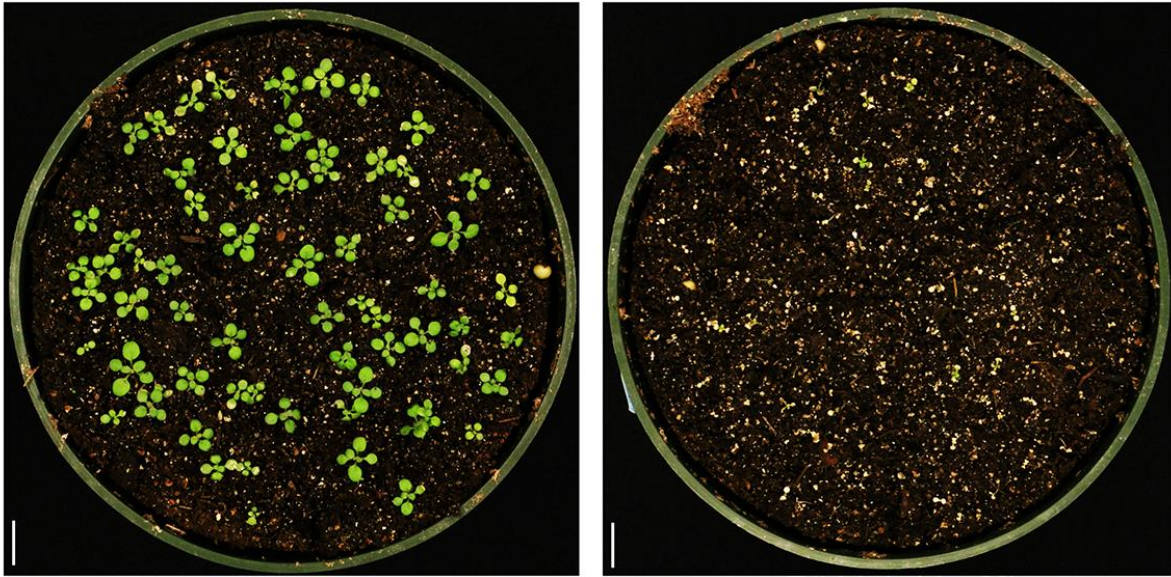

**DMSO (0.5%)**

**ES20 (500  $\mu$ M)**

**Figure 10.** Spraying ES20 inhibits the growth of soil grown Arabidopsis Col-0.

Arabidopsis Col-0 grown on soil sprayed with DMSO (0.5%) (left) and ES20 (500  $\mu$ M) (right). Images were taken at 7 days after spraying. Scale bars: 1 cm.

## Parsed Citations

**Arioli T, Peng L, Betzner AS, Burn J, Wittke W, Herth W, Camilleri C, Hofte H, Plazinski J, Birch R, Cork A, Glover J, Redmond J, Williamson RE (1998) Molecular analysis of cellulose biosynthesis in Arabidopsis. Science 279: 717-720**

Pubmed: [Author and Title](#)

Google Scholar: [Author Only](#) [Title Only](#) [Author and Title](#)

**Bashline L, Li S, Anderson CT, Lei L, Gu Y (2013) The endocytosis of cellulose synthase in Arabidopsis is dependent on mu2, a clathrin-mediated endocytosis adaptin. Plant Physiol 163: 150-160**

Pubmed: [Author and Title](#)

Google Scholar: [Author Only](#) [Title Only](#) [Author and Title](#)

**Brabham C, Lei L, Gu Y, Stork J, Barrett M, DeBolt S (2014) Indaziflam herbicidal action: a potent cellulose biosynthesis inhibitor. Plant Physiol 166: 1177-1185**

Pubmed: [Author and Title](#)

Google Scholar: [Author Only](#) [Title Only](#) [Author and Title](#)

**Bringmann M, Li E, Sampathkumar A, Kocabek T, Hauser MT, Persson S (2012) POM-POM2/cellulose synthase interacting1 is essential for the functional association of cellulose synthase and microtubules in Arabidopsis. Plant Cell 24: 163-177**

Pubmed: [Author and Title](#)

Google Scholar: [Author Only](#) [Title Only](#) [Author and Title](#)

**Brinkmeyer RS, Terando NH, Waldrep TW, Burow KW (1989) The Synthesis and Biological-Activity of Heterocyclic-Analogs of the Broadleaf Herbicide Isoxaben. Abstracts of Papers of the American Chemical Society 197: 56-Agro**

Pubmed: [Author and Title](#)

Google Scholar: [Author Only](#) [Title Only](#) [Author and Title](#)

**Clough SJ, Bent AF (1998) Floral dip: a simplified method for Agrobacterium-mediated transformation of Arabidopsis thaliana. Plant J 16: 735-743**

Pubmed: [Author and Title](#)

Google Scholar: [Author Only](#) [Title Only](#) [Author and Title](#)

**Crowell EF, Bischoff V, Desprez T, Rolland A, Stierhof YD, Schumacher K, Gonneau M, Hofte H, Vernhettes S (2009) Pausing of Golgi bodies on microtubules regulates secretion of cellulose synthase complexes in Arabidopsis. Plant Cell 21: 1141-1154**

Pubmed: [Author and Title](#)

Google Scholar: [Author Only](#) [Title Only](#) [Author and Title](#)

**DeBolt S, Gutierrez R, Ehrhardt DW, Melo CV, Ross L, Cutler SR, Somerville C, Bonetta D (2007) Morlin, an inhibitor of cortical microtubule dynamics and cellulose synthase movement. Proc Natl Acad Sci U S A 104: 5854-5859**

Pubmed: [Author and Title](#)

Google Scholar: [Author Only](#) [Title Only](#) [Author and Title](#)

**Delye C, Jasieniuk M, Le Corre V (2013) Deciphering the evolution of herbicide resistance in weeds. Trends Genet 29: 649-658**

Pubmed: [Author and Title](#)

Google Scholar: [Author Only](#) [Title Only](#) [Author and Title](#)

**Desprez T, Juraniec M, Crowell EF, Jouy H, Pochylova Z, Parcy F, Hofte H, Gonneau M, Vernhettes S (2007) Organization of cellulose synthase complexes involved in primary cell wall synthesis in Arabidopsis thaliana. Proc Natl Acad Sci U S A 104: 15572-15577**

Pubmed: [Author and Title](#)

Google Scholar: [Author Only](#) [Title Only](#) [Author and Title](#)

**Desprez T, Vernhettes S, Fagard M, Refregier G, Desnos T, Aletti E, Py N, Pelletier S, Hofte H (2002) Resistance against herbicide isoxaben and cellulose deficiency caused by distinct mutations in same cellulose synthase isoform CESA6. Plant Physiol 128: 482-490**

Pubmed: [Author and Title](#)

Google Scholar: [Author Only](#) [Title Only](#) [Author and Title](#)

**Doblin MS, Kurek I, Jacob-Wilk D, Delmer DP (2002) Cellulose biosynthesis in plants: from genes to rosettes. Plant Cell Physiol 43: 1407-1420**

Pubmed: [Author and Title](#)

Google Scholar: [Author Only](#) [Title Only](#) [Author and Title](#)

**Endler A, Kesten C, Schneider R, Zhang Y, Ivakov A, Froehlich A, Funke N, Persson S (2015) A Mechanism for Sustained Cellulose Synthesis during Salt Stress. Cell 162: 1353-1364**

Pubmed: [Author and Title](#)

Google Scholar: [Author Only](#) [Title Only](#) [Author and Title](#)

**Fernandes AN, Thomas LH, Altaner CM, Callow P, Forsyth VT, Apperley DC, Kennedy CJ, Jarvis MC (2011) Nanostructure of cellulose microfibrils in spruce wood. Proc Natl Acad Sci U S A 108: E1195-1203**

Pubmed: [Author and Title](#)

Google Scholar: [Author Only](#) [Title Only](#) [Author and Title](#)

**Fujita M, Himmelspach R, Ward J, Whittington A, Hasenbein N, Liu C, Truong TT, Galway ME, Mansfield SD, Hocart CH, Wasteneys GO (2013) The anisotropy1 D604N mutation in the Arabidopsis cellulose synthase1 catalytic domain reduces cell wall crystallinity and the velocity of cellulose synthase complexes. Plant Physiol 162: 74-85**

- Pubmed: [Author and Title](#)  
Google Scholar: [Author Only Title Only Author and Title](#)
- Gianessi LP (2013) The increasing importance of herbicides in worldwide crop production. Pest Manag Sci 69: 1099-1105**  
Pubmed: [Author and Title](#)  
Google Scholar: [Author Only Title Only Author and Title](#)
- Giddings TH, Jr., Brower DL, Staehelin LA (1980) Visualization of particle complexes in the plasma membrane of *Micrasterias denticulata* associated with the formation of cellulose fibrils in primary and secondary cell walls. J Cell Biol 84: 327-339**  
Pubmed: [Author and Title](#)  
Google Scholar: [Author Only Title Only Author and Title](#)
- Gonneau M, Desprez T, Guillot A, Vernhettes S, Hofte H (2014) Catalytic subunit stoichiometry within the cellulose synthase complex. Plant Physiol 166: 1709-1712**  
Pubmed: [Author and Title](#)  
Google Scholar: [Author Only Title Only Author and Title](#)
- Gu Y, Kaplinsky N, Bringmann M, Cobb A, Carroll A, Sampathkumar A, Baskin TI, Persson S, Somerville CR (2010) Identification of a cellulose synthase-associated protein required for cellulose biosynthesis. Proc Natl Acad Sci U S A 107: 12866-12871**  
Pubmed: [Author and Title](#)  
Google Scholar: [Author Only Title Only Author and Title](#)
- Gutierrez R, Lindeboom JJ, Paredes AR, Emons AM, Ehrhardt DW (2009) Arabidopsis cortical microtubules position cellulose synthase delivery to the plasma membrane and interact with cellulose synthase trafficking compartments. Nat Cell Biol 11: 797-806**  
Pubmed: [Author and Title](#)  
Google Scholar: [Author Only Title Only Author and Title](#)
- Haigler CH, Brown RMJ (1986) Transport of rosettes from the Golgi apparatus to the plasma membrane in isolated mesophyll cells of *Zinnia elegans* during differentiation to tracheary elements in suspension culture. Protoplasma 134: 111-120**  
Pubmed: [Author and Title](#)  
Google Scholar: [Author Only Title Only Author and Title](#)
- Harris DM, Corbin K, Wang T, Gutierrez R, Bertolo AL, Petti C, Smilgies DM, Estevez JM, Bonetta D, Urbanowicz BR, Ehrhardt DW, Somerville CR, Rose JK, Hong M, DeBolt S (2012) Cellulose microfibril crystallinity is reduced by mutating C-terminal transmembrane region residues CESA1A903V and CESA3T942I of cellulose synthase. Proc Natl Acad Sci U S A 109: 4098-4103**  
Pubmed: [Author and Title](#)  
Google Scholar: [Author Only Title Only Author and Title](#)
- Heap I (2014) Global perspective of herbicide-resistant weeds. Pest Manag Sci 70: 1306-1315**  
Pubmed: [Author and Title](#)  
Google Scholar: [Author Only Title Only Author and Title](#)
- Heim DR, Skomp JR, Tschabold EE, Larrinua IM (1990) Isoxaben Inhibits the Synthesis of Acid Insoluble Cell-Wall Materials in *Arabidopsis-Thaliana*. Plant Physiology 93: 695-700**  
Pubmed: [Author and Title](#)  
Google Scholar: [Author Only Title Only Author and Title](#)
- Hill JL, Jr., Hammudi MB, Tien M (2014) The Arabidopsis cellulose synthase complex: a proposed hexamer of CESA trimers in an equimolar stoichiometry. Plant Cell 26: 4834-4842**  
Pubmed: [Author and Title](#)  
Google Scholar: [Author Only Title Only Author and Title](#)
- Hu H, Zhang R, Tao Z, Li X, Li Y, Huang J, Li X, Han X, Feng S, Zhang G, Peng L (2018) Cellulose Synthase Mutants Distinctively Affect Cell Growth and Cell Wall Integrity for Plant Biomass Production in Arabidopsis. Plant Cell Physiol 59: 1144-1157**  
Pubmed: [Author and Title](#)  
Google Scholar: [Author Only Title Only Author and Title](#)
- Hu Z, Vanderhaeghen R, Cools T, Wang Y, De Clercq I, Leroux O, Nguyen L, Belt K, Millar AH, Audenaert D, Hilson P, Small I, Mouille G, Vernhettes S, Van Breusegem F, Whelan J, Hofte H, De Veylder L (2016) Mitochondrial Defects Confer Tolerance against Cellulose Deficiency. Plant Cell 28: 2276-2290**  
Pubmed: [Author and Title](#)  
Google Scholar: [Author Only Title Only Author and Title](#)
- Hu Z, Zhang T, Rombaut D, Decaestecker W, Xing A, D'Haeyer S, Hofer R, Vercauteren I, Karimi M, Jacobs TB, De Veylder L (2019) Genome-Editing Based Engineering of CESA3 Dual Cellulose-Inhibitor Resistant Plants. Plant Physiol 180: 827-836**  
Pubmed: [Author and Title](#)  
Google Scholar: [Author Only Title Only Author and Title](#)
- Huang L, Li X, Zhang W, Ung N, Liu N, Yin X, Li Y, Mcewan RE, Dilkes B, Dai M, Hicks GR, Raikhel NV, Staiger CJ, Zhang C (2020) Endosidin20 targets cellulose synthase catalytic domain to inhibit cellulose biosynthesis.**
- Huggenberger F, Gueguen F (1987) Yield Response to Preemergence Control of Broad-Leaved Weeds in Winter Cereals with Isoxaben in France. Crop Protection 6: 75-81**  
Pubmed: [Author and Title](#)  
Google Scholar: [Author Only Title Only Author and Title](#)

**Jamet P, Thoisydur JC (1988) Pesticide Mobility in Soils - Assessment of the Movement of Isoxaben by Soil Thin-Layer Chromatography. Bulletin of Environmental Contamination and Toxicology 41: 135-142**

Pubmed: [Author and Title](#)

Google Scholar: [Author Only](#) [Title Only](#) [Author and Title](#)

**Lei L, Li S, Gu Y (2012) Cellulose synthase interactive protein 1 (CS1) mediates the intimate relationship between cellulose microfibrils and cortical microtubules. Plant Signal Behav 7: 714-718**

Pubmed: [Author and Title](#)

Google Scholar: [Author Only](#) [Title Only](#) [Author and Title](#)

**Mueller SC, Brown RM, Jr. (1980) Evidence for an intramembrane component associated with a cellulose microfibril-synthesizing complex in higher plants. J Cell Biol 84: 315-326**

Pubmed: [Author and Title](#)

Google Scholar: [Author Only](#) [Title Only](#) [Author and Title](#)

**Mueller SC, Brown RM, Jr., Scott TK (1976) Cellulosic microfibrils: nascent stages of synthesis in a higher plant cell. Science 194: 949-951**

Pubmed: [Author and Title](#)

Google Scholar: [Author Only](#) [Title Only](#) [Author and Title](#)

**Newman RH, Hill SJ, Harris PJ (2013) Wide-angle x-ray scattering and solid-state nuclear magnetic resonance data combined to test models for cellulose microfibrils in mung bean cell walls. Plant Physiol 163: 1558-1567**

Pubmed: [Author and Title](#)

Google Scholar: [Author Only](#) [Title Only](#) [Author and Title](#)

**Paredez AR, Somerville CR, Ehrhardt DW (2006) Visualization of cellulose synthase demonstrates functional association with microtubules. Science 312: 1491-1495**

Pubmed: [Author and Title](#)

Google Scholar: [Author Only](#) [Title Only](#) [Author and Title](#)

**Pear JR, Kawagoe Y, Schreckengost WE, Delmer DP, Stalker DM (1996) Higher plants contain homologs of the bacterial celA genes encoding the catalytic subunit of cellulose synthase. Proc Natl Acad Sci U S A 93: 12637-12642**

Pubmed: [Author and Title](#)

Google Scholar: [Author Only](#) [Title Only](#) [Author and Title](#)

**Persson S, Paredez A, Carroll A, Palsdottir H, Doblin M, Poindexter P, Khitrov N, Auer M, Somerville CR (2007) Genetic evidence for three unique components in primary cell-wall cellulose synthase complexes in Arabidopsis. Proc Natl Acad Sci U S A 104: 15566-15571**

Pubmed: [Author and Title](#)

Google Scholar: [Author Only](#) [Title Only](#) [Author and Title](#)

**Peterson MA, McMaster SA, Riechers DE, Skelton J, Stahlman PW (2016) 2,4-D Past, Present, and Future: A Review. Weed Technology 30: 303-345**

Pubmed: [Author and Title](#)

Google Scholar: [Author Only](#) [Title Only](#) [Author and Title](#)

**Polko JK, Barnes WJ, Voiniciuc C, Doctor S, Steinwand B, Hill JL, Jr., Tien M, Pauly M, Anderson CT, Kieber JJ (2018) SHOU4 Proteins Regulate Trafficking of Cellulose Synthase Complexes to the Plasma Membrane. Curr Biol 28: 3174-3182 e3176**

Pubmed: [Author and Title](#)

Google Scholar: [Author Only](#) [Title Only](#) [Author and Title](#)

**Sampathkumar A, Gutierrez R, McFarlane HE, Bringmann M, Lindeboom J, Emons AM, Samuels L, Ketelaar T, Ehrhardt DW, Persson S (2013) Patterning and lifetime of plasma membrane-localized cellulose synthase is dependent on actin organization in Arabidopsis interphase cells. Plant Physiol 162: 675-688**

Pubmed: [Author and Title](#)

Google Scholar: [Author Only](#) [Title Only](#) [Author and Title](#)

**Scheible WR, Eshed R, Richmond T, Delmer D, Somerville C (2001) Modifications of cellulose synthase confer resistance to isoxaben and thiazolidinone herbicides in Arabidopsis lxr1 mutants. Proceedings of the National Academy of Sciences of the United States of America 98: 10079-10084**

Pubmed: [Author and Title](#)

Google Scholar: [Author Only](#) [Title Only](#) [Author and Title](#)

**Shim I, Law R, Kileeg Z, Stronghill P, Northey JGB, Strap JL, Bonetta DT (2018) Alleles Causing Resistance to Isoxaben and Flupoxam Highlight the Significance of Transmembrane Domains for CESA Protein Function. Front Plant Sci 9: 1152**

Pubmed: [Author and Title](#)

Google Scholar: [Author Only](#) [Title Only](#) [Author and Title](#)

**Tateno M, Brabham C, DeBolt S (2016) Cellulose biosynthesis inhibitors - a multifunctional toolbox. J Exp Bot 67: 533-542**

Pubmed: [Author and Title](#)

Google Scholar: [Author Only](#) [Title Only](#) [Author and Title](#)

**Taylor NG, Howells RM, Huttly AK, Vickers K, Turner SR (2003) Interactions among three distinct CesA proteins essential for cellulose synthesis. Proc Natl Acad Sci U S A 100: 1450-1455**

Pubmed: [Author and Title](#)

Google Scholar: [Author Only](#) [Title Only](#) [Author and Title](#)

**Worden N, Wilkop TE, Esteve VE, Jeannotte R, Lathe R, Vernhettes S, Weimer B, Hicks G, Alonso J, Labavitch J, Persson S, Ehrhardt D, Drakakaki G (2015) CESA trafficking inhibitor inhibits cellulose deposition and interferes with the trafficking of cellulose synthase complexes and their associated proteins KORRIGAN1 and POM2/CELLULOSE SYNTHASE INTERACTIVE PROTEIN1. Plant Physiol 167: 381-393**

Pubmed: [Author and Title](#)

Google Scholar: [Author Only](#) [Title Only](#) [Author and Title](#)

**Zhang W, Cai C, Staiger CJ (2019) Myosins XI Are Involved in Exocytosis of Cellulose Synthase Complexes. Plant Physiol 179: 1537-1555**

Pubmed: [Author and Title](#)

Google Scholar: [Author Only](#) [Title Only](#) [Author and Title](#)

**Zhang Y, Nikolovski N, Sorieul M, Vellosillo T, McFarlane HE, Dupree R, Kesten C, Schneider R, Driemeier C, Lathe R, Lampugnani E, Yu X, Ivakov A, Doblin MS, Mortimer JC, Brown SP, Persson S, Dupree P (2016) Golgi-localized STELLO proteins regulate the assembly and trafficking of cellulose synthase complexes in Arabidopsis. Nat Commun 7: 11656**

Pubmed: [Author and Title](#)

Google Scholar: [Author Only](#) [Title Only](#) [Author and Title](#)

**Zhu X, Li S, Pan S, Xin X, Gu Y (2018) CSI1, PATROL1, and exocyst complex cooperate in delivery of cellulose synthase complexes to the plasma membrane. Proc Natl Acad Sci U S A 115: E3578-E3587**

Pubmed: [Author and Title](#)

Google Scholar: [Author Only](#) [Title Only](#) [Author and Title](#)
